# Supplementary material
Source: PubMed Central journal article supplement (PMC5820654)
Supplement: sb7b00328_si_001.pdf [file sb7b00328_si_001.pdf]

Supporting Information for

## **Orthogonality and burdens of heterologous AND gate gene circuits in *E. coli***

Qijun Liu<sup>1,2,3</sup>, Jörg Schumacher<sup>4</sup>, Xinyi Wan<sup>1,2</sup>, Chunbo Lou<sup>5</sup> and Baojun Wang<sup>1,2\*</sup>

<sup>1</sup>School of Biological Sciences, University of Edinburgh, Edinburgh, EH9 3FF, UK

<sup>2</sup>Centre for Synthetic and Systems Biology, University of Edinburgh, Edinburgh, EH9 3JR, UK

<sup>3</sup>Department of Chemistry and Biology, National University of Defense Technology, China

<sup>4</sup>Department of Life Sciences, Imperial College London, London, SW7 2AZ, UK

<sup>5</sup>CAS Key Laboratory of Microbial Physiological and Metabolic Engineering, Institute of  
Microbiology, Chinese Academy of Sciences, Beijing, 100101, China

\*Corresponding author. Email: baojun.wang@ed.ac.uk

### **Table of Contents**

Supplementary Figures S1-S7

Supplementary Tables S1-S10

Supplementary Methods

Supplementary References (1-17)

|                                                                                     |    |
|-------------------------------------------------------------------------------------|----|
| 1. Plasmid maps showing the gene circuit constructs used in this study.....         | 2  |
| 2. Cell growth measurement and the growth curve model fitting .....                 | 4  |
| 3. Gene expression analysis.....                                                    | 7  |
| 3.1 Gene expression calculation.....                                                | 7  |
| 3.2 Identity of the RNA-Seq biological duplicate samples.....                       | 8  |
| 3.3 Expression of other genes in the circuit-hosting plasmids .....                 | 11 |
| 3.4 Identification of differentially expressed genes .....                          | 12 |
| 4. Functional analysis of the identified differentially expressed genes.....        | 12 |
| 5. List of host genes of specific functional categories analyzed in this study..... | 15 |
| 5.1 Resource related genes.....                                                     | 15 |
| 5.2 The expression of transcription factors.....                                    | 17 |
| 5.3 The expression of housekeeping genes .....                                      | 17 |
| 5.4 The expression of essential genes in the host.....                              | 18 |
| 6. List of genetic part sequences used in the study .....                           | 19 |
| 7. Supplementary references.....                                                    | 24 |

# 1. Plasmid maps showing the gene circuit constructs used in this study

**A** *pSB3K3* carrying the AND gate

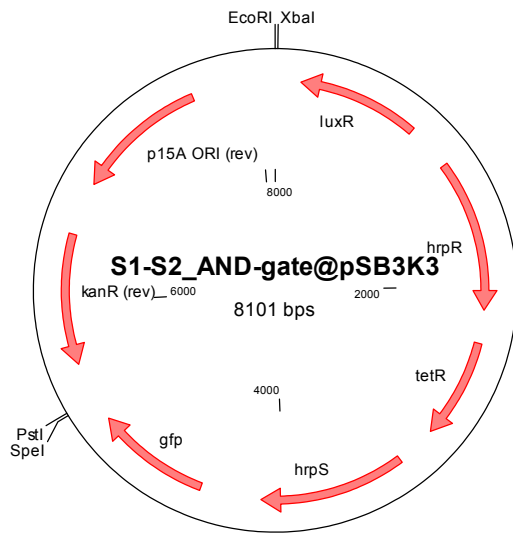

**B** *pSB4K5* carrying the AND gate

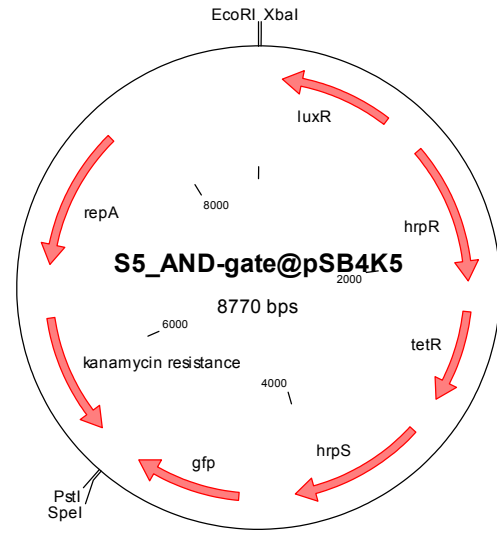

**C** *pSB3K3* carrying the Inputs-gfp

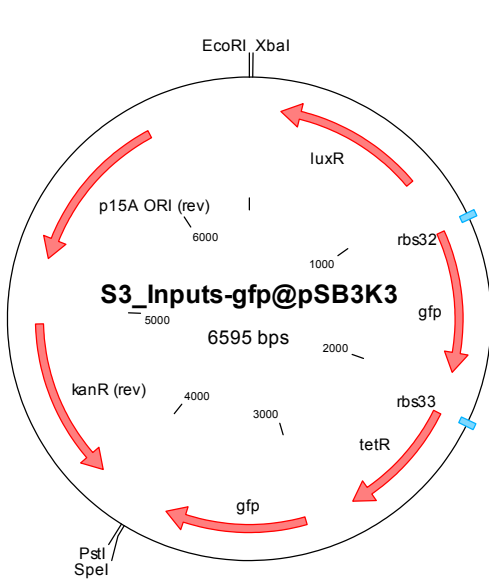

**D** *pSB4K5* carrying the Inputs-gfp

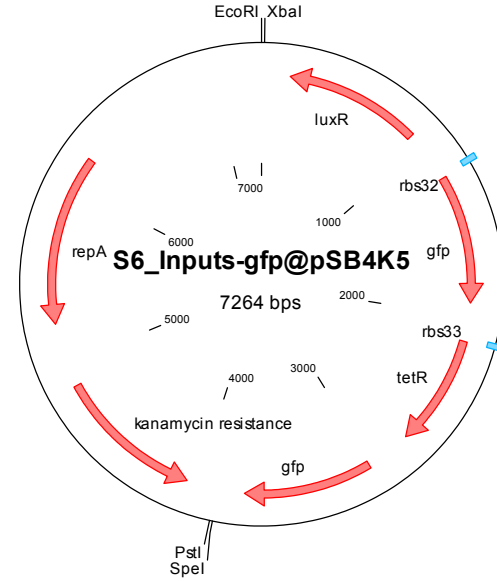

**E** *pSB3K3* plasmid backbone

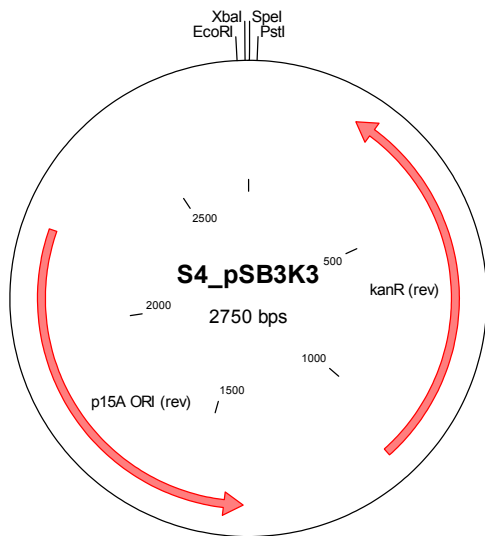

**F** *pSB4K5* plasmid backbone

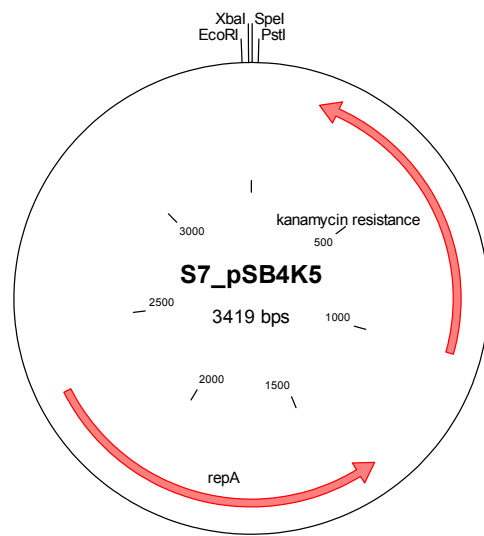

**Figure S1. Plasmid maps showing the gene circuit constructs used in this study.** (A) The AND gate circuit (*J115-rbs32luxR-P<sub>lux2</sub>-rbs32hrpR-B15-J114-rbs30tetR-B15-P<sub>tet2</sub>-rbs33St-hrpL-rbs30gfp-B15*) in the medium copy number *pSB3K3* plasmid (Samples 1 &2). (B) The AND gate circuit in the low copy number *pSB4K5* plasmid (Sample 5). (C) The promoter-inputs circuit (*J115-rbs32luxR-P<sub>lux2</sub>-rbs32gfp-B15-J114-rbs30tetR-B15-P<sub>tet2</sub>-rbs33gfp-B15*) in *pSB3K3* plasmid (Sample 3). (D) The promoter-inputs circuit in *pSB4K5* plasmid (Sample 6). (E) The empty *pSB3K3* plasmid (Sample 4). (F) The empty *pSB4K5* plasmid (Sample 7). Maps were generated in Clone Manager 7.1. Related to Figure 1.

## 2. Cell growth measurement and the growth curve model fitting

Cell growth was monitored by measuring the sample cell density (OD<sub>600</sub> readings) periodically (around 30 min). The data were recorded as shown in the below table.

**Table S1. Cell growth density raw data (OD<sub>600</sub> readings)**

| Time (min) | S1-1  | S1-2  | S1-3  | S2-1  | S2-2  | S2-3  | S3-1  | S3-2  | S3-3  | S4-1  |
|------------|-------|-------|-------|-------|-------|-------|-------|-------|-------|-------|
| 0          | 0.021 | 0.018 | 0.024 | 0.018 | 0.019 | 0.021 | 0.024 | 0.019 | 0.021 | 0.016 |
| 65         | 0.033 | 0.037 | 0.041 | 0.035 | 0.038 | 0.034 | 0.030 | 0.037 | 0.032 | 0.064 |
| 95         | 0.054 | 0.055 | 0.06  | 0.057 | 0.059 | 0.065 | 0.056 | 0.062 | 0.057 | 0.097 |
| 125        | 0.093 | 0.086 | 0.087 | 0.092 | 0.091 | 0.098 | 0.083 | 0.089 | 0.088 | 0.182 |
| 155        | 0.148 | 0.151 | 0.152 | 0.154 | 0.162 | 0.153 | 0.138 | 0.139 | 0.144 | 0.322 |
| 185        | 0.259 | 0.258 | 0.263 | 0.272 | 0.278 | 0.275 | 0.243 | 0.247 | 0.251 | 0.608 |
| 230        | 0.551 | 0.560 | 0.555 | 0.586 | 0.595 | 0.589 | 0.527 | 0.528 | 0.508 | 1.165 |
| 250        | 0.840 | 0.852 | 0.840 | 0.890 | 0.906 | 0.881 | 0.801 | 0.779 | 0.754 | 1.666 |
| 275        | 1.261 | 1.228 | 1.139 | 1.368 | 1.361 | 1.384 | 1.226 | 1.163 | 1.188 | 2.010 |
| 305        | 1.620 | 1.654 | 1.642 | 1.834 | 1.868 | 1.850 | 1.584 | 1.606 | 1.596 | 2.316 |
| 335        | 2.010 | 2.05  | 2.044 | 2.306 | 2.290 | 2.312 | 1.894 | 1.912 | 1.908 | 2.700 |

continued columns

| S4-2  | S4-3  | S5-1  | S5-2  | S5-3  | S6-1  | S6-2  | S6-3  | S7-1  | S7-2  | S7-3  |
|-------|-------|-------|-------|-------|-------|-------|-------|-------|-------|-------|
| 0.019 | 0.018 | 0.021 | 0.018 | 0.024 | 0.016 | 0.024 | 0.020 | 0.015 | 0.020 | 0.018 |
| 0.068 | 0.065 | 0.041 | 0.042 | 0.047 | 0.040 | 0.038 | 0.043 | 0.072 | 0.073 | 0.070 |
| 0.098 | 0.103 | 0.071 | 0.078 | 0.076 | 0.070 | 0.073 | 0.078 | 0.097 | 0.106 | 0.101 |
| 0.178 | 0.179 | 0.131 | 0.126 | 0.127 | 0.107 | 0.113 | 0.114 | 0.176 | 0.180 | 0.182 |
| 0.315 | 0.312 | 0.220 | 0.228 | 0.230 | 0.210 | 0.197 | 0.192 | 0.331 | 0.337 | 0.328 |
| 0.615 | 0.589 | 0.428 | 0.435 | 0.426 | 0.366 | 0.132 | 0.369 | 0.664 | 0.650 | 0.654 |
| 1.116 | 1.004 | 0.950 | 0.965 | 0.956 | 0.830 | 0.836 | 0.797 | 1.223 | 1.184 | 1.181 |
| 1.651 | 1.582 | 1.327 | 1.315 | 1.308 | 1.185 | 1.165 | 1.098 | 1.694 | 1.659 | 1.627 |
| 1.973 | 2.002 | 1.862 | 1.856 | 1.792 | 1.702 | 1.712 | 1.720 | 2.014 | 2.024 | 1.968 |
| 2.306 | 2.292 | 2.120 | 2.144 | 2.136 | 2.050 | 2.066 | 2.056 | 2.398 | 2.406 | 2.384 |
| 2.724 | 2.702 | 2.550 | 2.564 | 2.546 | 2.406 | 2.446 | 2.420 | 2.854 | 2.822 | 2.834 |

S1-S7 indicates sample type labels. Measurement are three repeats for each sample type.

The cell growth data (Table S1) above were used to plot growth curves as shown in Figure 2A. The nonlinear least square fitting function (cftool) in Matlab (MathWorks R2014a) was applied to fit the experimental data to parameterize the Gompertz model for cell growth<sup>1</sup> (see Methods section for detail). Figure S2 shows the model fitting performance for each sample cell growth data.

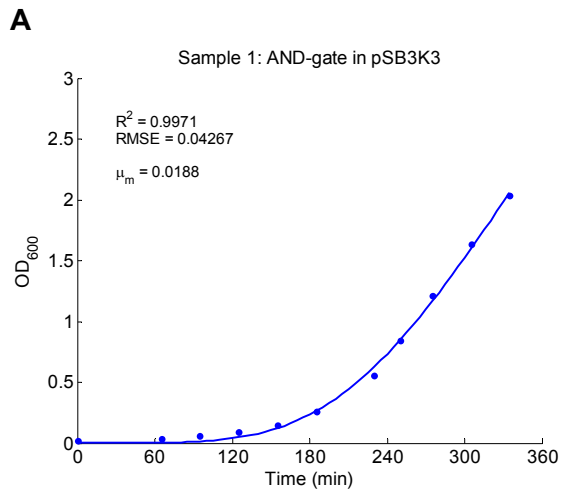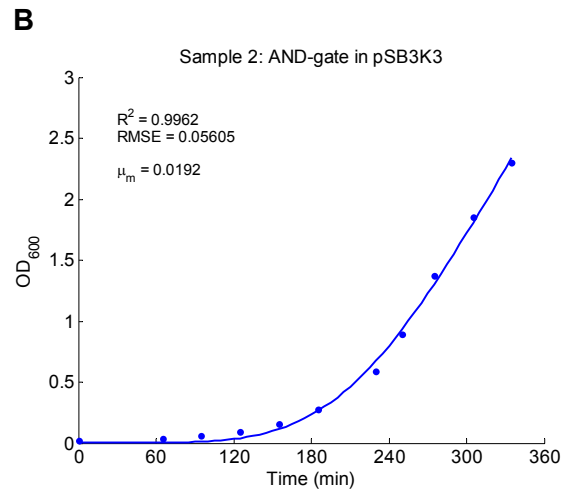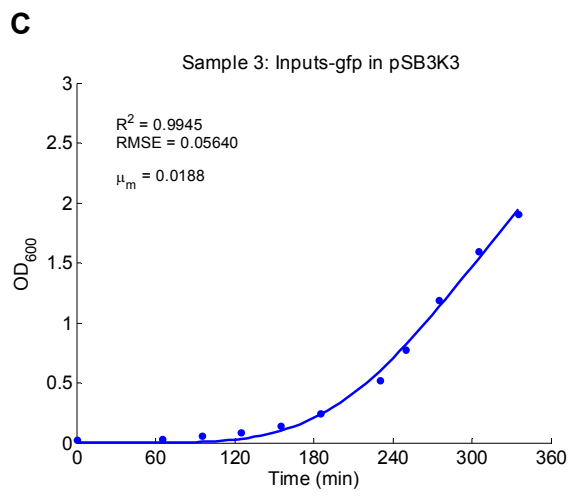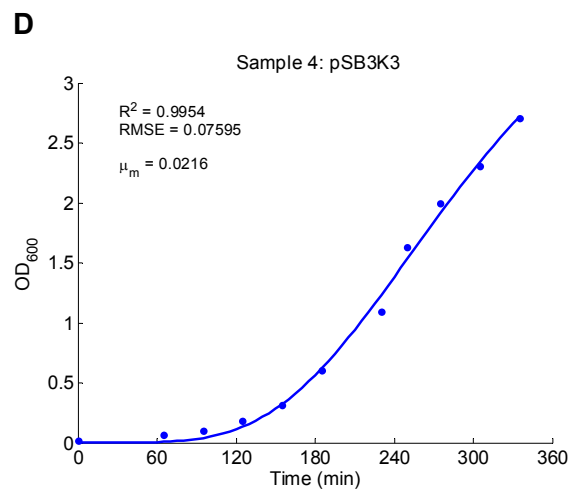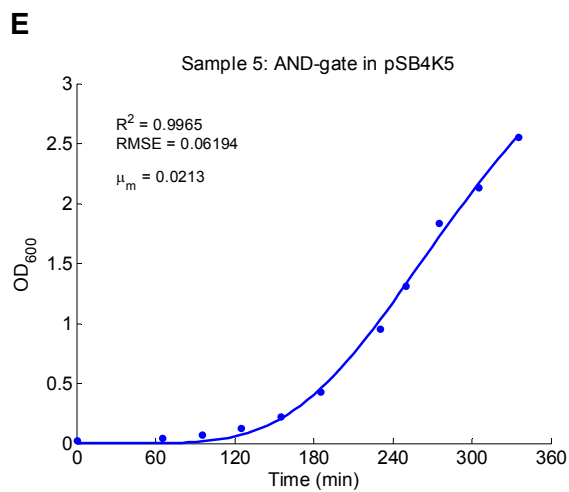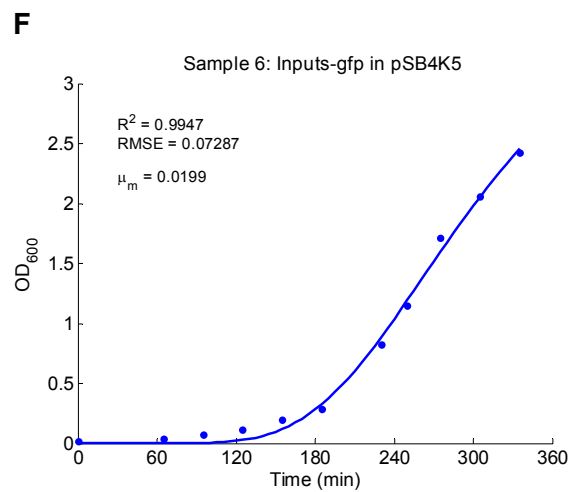

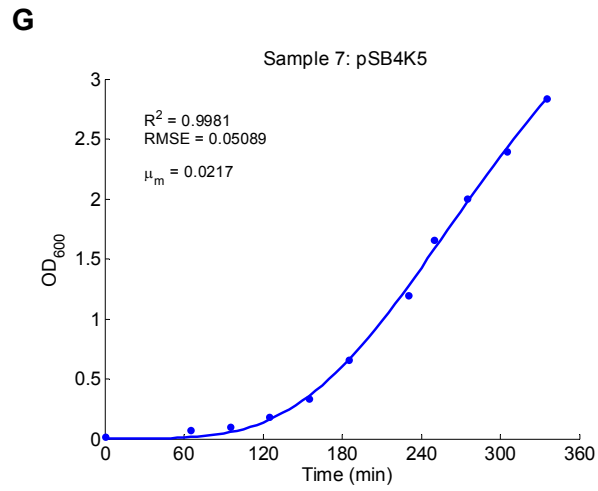

**Figure S2. Growth curve model fitting results for all samples in the study.** The displayed include the coefficient of determination ( $R^2$ ), root mean squared error (RMSE) and value of  $\mu_m$  for each fitting.

### 3. Gene expression analysis

#### 3.1 Gene expression calculation

To obtain the expression level for each gene, we mapped the reads in RNA-Seq sequencing datasets to the genome of *E. coli* K-12 substrain MG1655 (NCBI accession number NC\_00913) and then counted the number of reads mapped to each gene according to their location in the chromosome. The reads were then normalized according to the cognate gene length to obtain the relative expression level for each gene (RPKM value). The distribution of the expression levels of all genes across all seven samples, shown in Figure S3, seems to follow an expected normal distribution.

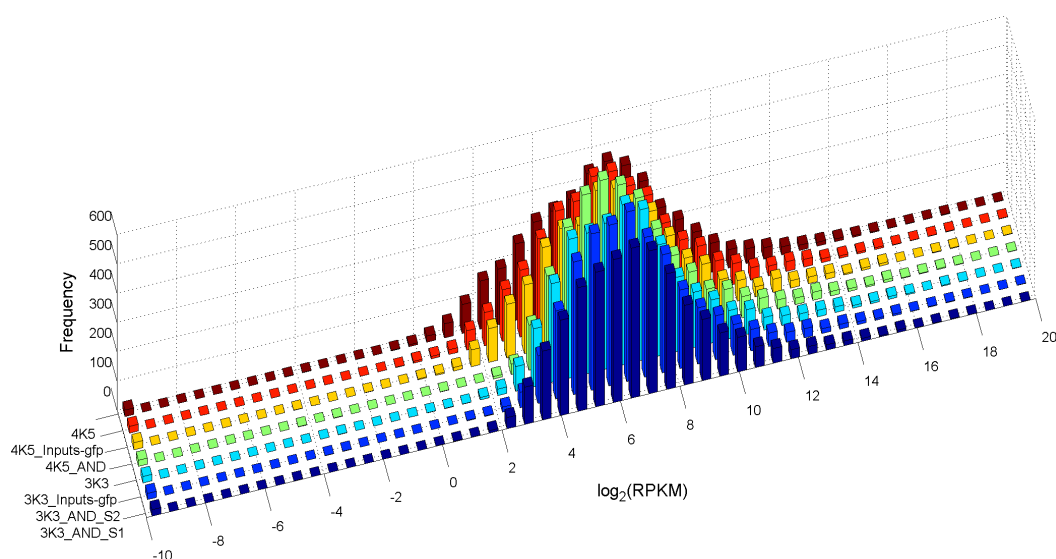

**Figure S3. Distribution of transcriptome expression profiles of all samples.**

To increase accuracy, under the assumption of normal distribution, we treated genes with the expression values that are out of the typical range of  $\mu \pm 3\sigma$  as exceptions and thus did not take them into account for subsequent statistical comparison analysis. Here, we filtered out those genes due to their expression levels are either too high or too low, as listed in Table S2.

**Table S2. List of genes with too high or too low expression levels and their RPKM values**

| Samples                 | S1                 | S2                 | S3            | S4                 | S5                 | S6            | S7                |
|-------------------------|--------------------|--------------------|---------------|--------------------|--------------------|---------------|-------------------|
| Means                   | 6.4747             | 6.5724             | 6.5059        | 6.5862             | 6.2619             | 6.2717        | 6.1154            |
| Std.                    | 2.4243             | 2.3076             | 2.3905        | 2.3015             | 2.5717             | 2.5756        | 2.6779            |
| Too low expressed genes | <i>insX</i> 0.0386 | <i>insX</i> 0.0826 | <i>insX</i> 0 | <i>insX</i> 0.0414 | <i>insX</i> 0.0496 | <i>insX</i> 0 | <i>insX</i> 0.053 |
|                         | <i>yagB</i> 0      | <i>yagB</i> 0      | <i>yagB</i> 0 | <i>yagB</i> 0      | <i>yagB</i> 0      | <i>yagB</i> 0 | <i>yagB</i> 0     |
|                         | <i>yagA</i> 0      | <i>yagA</i> 0      | <i>yagA</i> 0 | <i>yagA</i> 0      | <i>yagA</i> 0      | <i>yagA</i> 0 | <i>yagA</i> 0     |
|                         | <i>yagE</i> 0      | <i>yagE</i> 0      | <i>yagE</i> 0 | <i>yagE</i> 0      | <i>yagE</i> 0      | <i>yagE</i> 0 | <i>yagE</i> 0     |
|                         | <i>yagF</i> 0      | <i>yagF</i> 0      | <i>yagF</i> 0 | <i>yagF</i> 0      | <i>yagF</i> 0      | <i>yagF</i> 0 | <i>yagF</i> 0     |
|                         | <i>yagG</i> 0      | <i>yagG</i> 0      | <i>yagG</i> 0 | <i>yagG</i> 0      | <i>yagG</i> 0      | <i>yagG</i> 0 | <i>yagG</i> 0     |
|                         | <i>yagH</i> 0      | <i>yagH</i> 0      | <i>yagH</i> 0 | <i>yagH</i> 0      | <i>yagH</i> 0      | <i>yagH</i> 0 | <i>yagH</i> 0     |
|                         | <i>yagI</i> 0      | <i>yagI</i> 0      | <i>yagI</i> 0 | <i>yagI</i> 0      | <i>yagI</i> 0      | <i>yagI</i> 0 | <i>yagI</i> 0     |
|                         | <i>argF</i> 0      | <i>argF</i> 0.1305 | <i>argF</i> 0 | <i>argF</i> 0      | <i>argF</i> 0      | <i>argF</i> 0 | <i>argF</i> 0.083 |
|                         | <i>rfbD</i> 0      | <i>rfbD</i> 0      | <i>rfbD</i> 0 | <i>rfbD</i> 0      | <i>ykgS</i> 0      | <i>rfbD</i> 0 | <i>rfbD</i> 0     |

|                          |                    |                    |                    |                    |                    |                    |                    |
|--------------------------|--------------------|--------------------|--------------------|--------------------|--------------------|--------------------|--------------------|
|                          | <i>rfbB</i> 0      | <i>rfbB</i> 0      | <i>rfbB</i> 0      | <i>rfbB</i> 0      | <i>ybfI</i> 0      | <i>rfbB</i> 0      | <i>rfbB</i> 0      |
|                          | <i>wcaN0</i>       | <i>wcaN0</i>       | <i>wcaN0</i>       | <i>wcaN0</i>       | <i>safA</i> 0.305  | <i>wcaN0</i>       | <i>wcaN0</i>       |
|                          | <i>wcaM0</i>       | <i>wcaM0</i>       | <i>wcaM0</i>       | <i>wcaM0</i>       | <i>rfbD</i> 0      | <i>wcaM0</i>       | <i>wcaM0</i>       |
|                          | <i>wcaL</i> 0      | <i>wcaL</i> 0      | <i>wcaL</i> 0      | <i>wcaL</i> 0      | <i>rfbB</i> 0      | <i>wcaL</i> 0      | <i>wcaL</i> 0      |
|                          | <i>wcaK</i> 0      | <i>wcaK</i> 0      | <i>wcaK</i> 0      | <i>wcaK</i> 0      | <i>wcaN0</i>       | <i>wcaK</i> 0      | <i>wcaK</i> 0      |
|                          | <i>wzxC</i> 0      | <i>wzxC</i> 0      | <i>wzxC</i> 0      | <i>wzxC</i> 0      | <i>wcaM0</i>       | <i>wzxC</i> 0      | <i>wzxC</i> 0      |
|                          | <i>wcaJ</i> 0      | <i>wcaJ</i> 0      | <i>wcaJ</i> 0      | <i>wcaJ</i> 0      | <i>wcaL</i> 0      | <i>wcaJ</i> 0      | <i>wcaJ</i> 0      |
|                          | <i>cpsG</i> 0      | <i>cpsG</i> 0      | <i>cpsG</i> 0      | <i>cpsG</i> 0.096  | <i>wcaK</i> 0      | <i>cpsG</i> 0      | <i>cpsG</i> 0      |
|                          | <i>cpsB</i> 0      | <i>cpsB</i> 0      | <i>cpsB</i> 0      | <i>cpsB</i> 0      | <i>wzxC</i> 0      | <i>cpsB</i> 0      | <i>cpsB</i> 0      |
|                          | <i>wcaI</i> 0      | <i>wcaI</i> 0      | <i>wcaI</i> 0      | <i>wcaI</i> 0      | <i>wcaJ</i> 0      | <i>wcaI</i> 0      | <i>wcaI</i> 0      |
|                          | <i>wcaH0</i>       | <i>wcaH0</i>       | <i>wcaH0</i>       | <i>wcaH0</i>       | <i>cpsG</i> 0      | <i>wcaH0</i>       | <i>wcaH0</i>       |
|                          | <i>wcaG0</i>       | <i>wcaG0</i>       | <i>wcaG0</i>       | <i>wcaG0</i>       | <i>cpsB</i> 0      | <i>wcaG0</i>       | <i>wcaG0</i>       |
|                          | <i>gmd</i> 0       | <i>gmd</i> 0       | <i>gmd</i> 0.132   | <i>gmd</i> 0       | <i>wcaI</i> 0      | <i>gmd</i> 0       | <i>gmd</i> 0       |
|                          |                    |                    |                    |                    | <i>wcaH0</i>       |                    | <i>wcaF</i> 0      |
|                          |                    |                    |                    |                    | <i>wcaG0</i>       |                    | <i>yfdM</i> 0.310  |
|                          |                    |                    |                    |                    | <i>gmd</i> 0       |                    |                    |
| Too high expressed genes | <i>mcaS</i> 7.76E5 | <i>mcaS</i> 9.56E5 | <i>cyaR</i> 2.11E5 | <i>mcaS</i> 7.65E5 | <i>cyaR</i> 2.05E5 | <i>nmpC</i> 1.24E5 | <i>nmpC</i> 1.14E5 |
|                          | <i>cyaR</i> 1.99E5 | <i>cyaR</i> 2.44E5 | <i>gcvB</i> 1.54E5 | <i>cyaR</i> 2.06E5 | <i>ssrS</i> 2.71E5 | <i>mcaS</i> 9.44E5 | <i>mcaS</i> 1.02E6 |
|                          | <i>gcvB</i> 9.29E5 | <i>gcvB</i> 1.09E5 | <i>ssrS</i> 1.89E5 | <i>gcvB</i> 1.02E5 |                    | <i>cyaR</i> 2.18E5 | <i>cyaR</i> 2.14E5 |
|                          | <i>ssrS</i> 1.75E5 | <i>ssrS</i> 1.84E5 |                    | <i>ssrS</i> 1.60E5 |                    | <i>ryfD</i> 4.83E4 | <i>ryfD</i> 4.75E4 |
|                          |                    |                    |                    |                    |                    | <i>gcvB</i> 7.12E4 | <i>gcvB</i> 3.59E4 |
|                          |                    |                    |                    |                    |                    | <i>ssrS</i> 2.44E5 | <i>ssrS</i> 2.07E5 |
|                          |                    |                    |                    |                    |                    | <i>rbsD</i> 1.55E4 |                    |

### 3.2 Identity of the RNA-Seq biological duplicate samples

To verify the repeatability and quality of the RNA-Seq in this study, we have produced biological duplicate for the AND-gate in *pSB3K3* condition, i.e. Sample 1 and Sample 2. Figure S4 shows that the correlation of gene expression in the two replicate samples is significantly high ( $R^2 = 0.9788$ ), indicating the RNA-Seq performed have excellent reproducibility and is of high credibility. This is also reflected in the uniform mapped reads profiles of the plasmid hosted genes from the two biological duplicate samples (S1 and S2) as shown in Figure S5A-B.

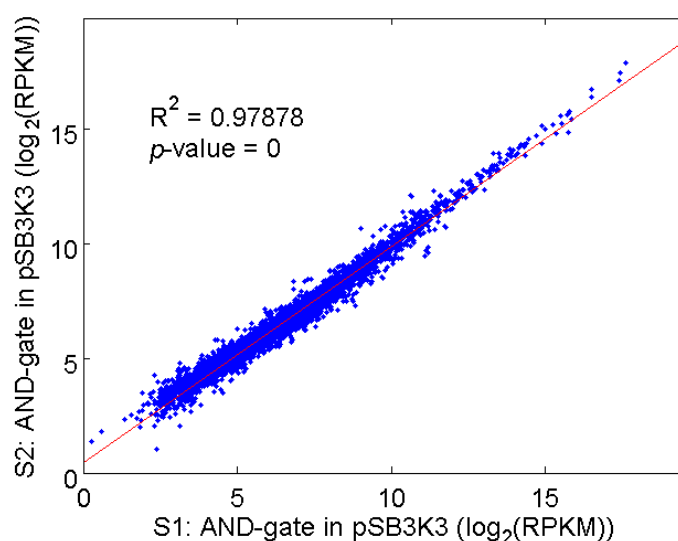

Figure S4. Correlation of gene expression of the biological duplicate samples (S1 vs S2).



### A S1: AND-gate in pSB3K3

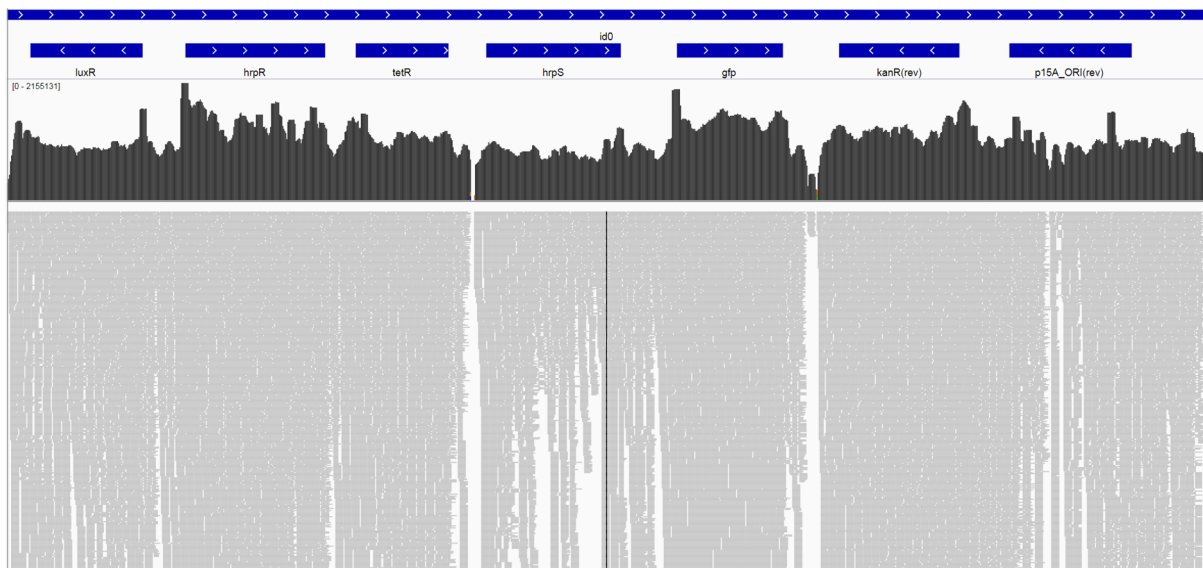

### B S2: AND-gate in pSB3K3

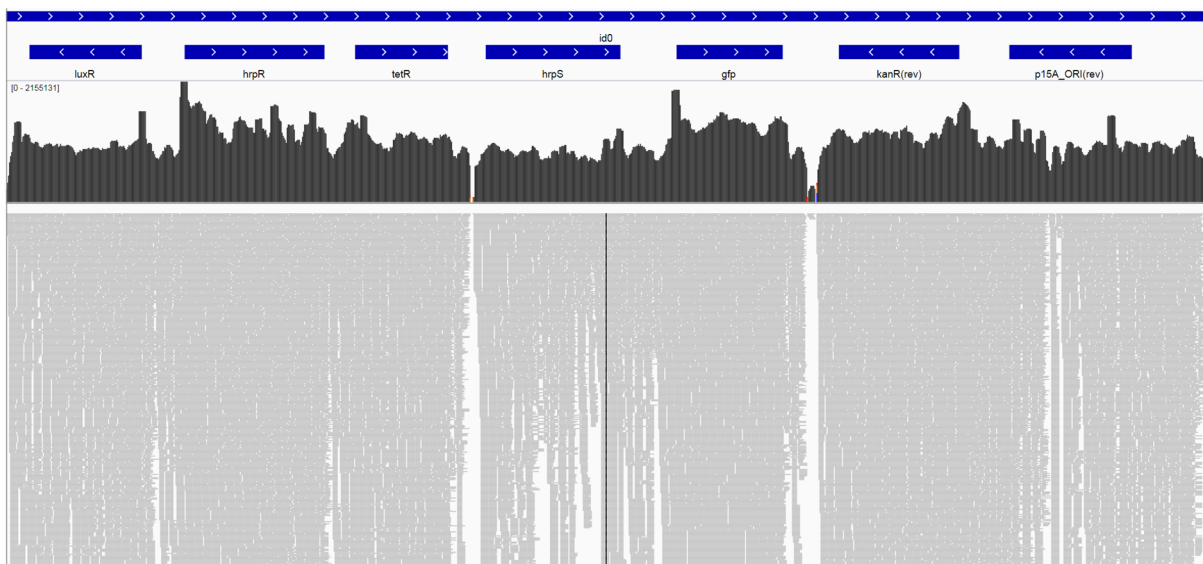

### C S3: Inputs-gfp in pSB3K3

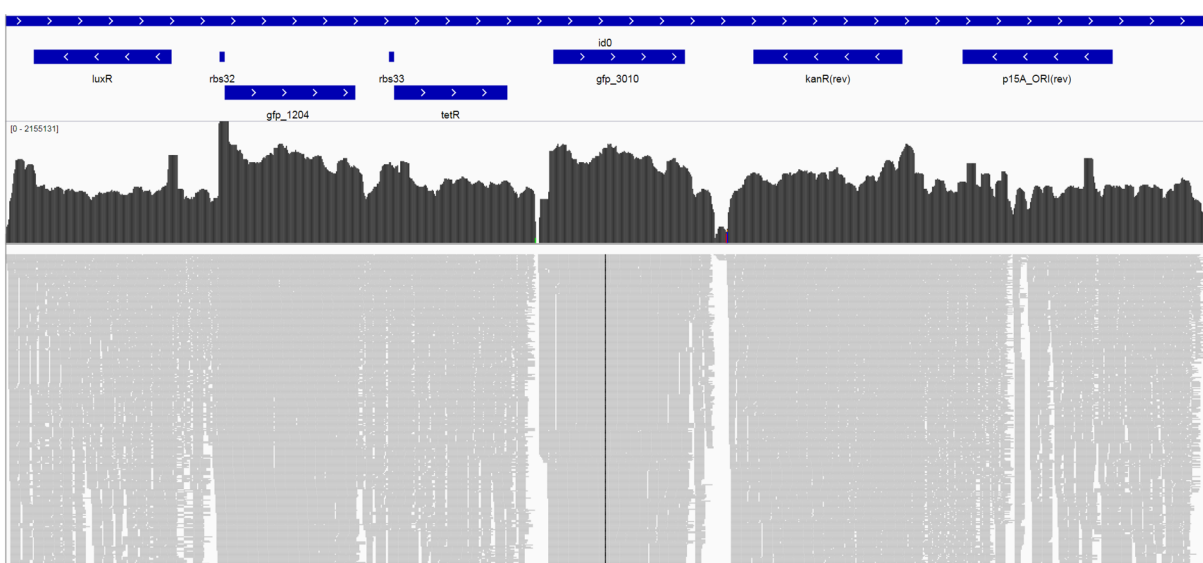

### D S4: pSB3K3

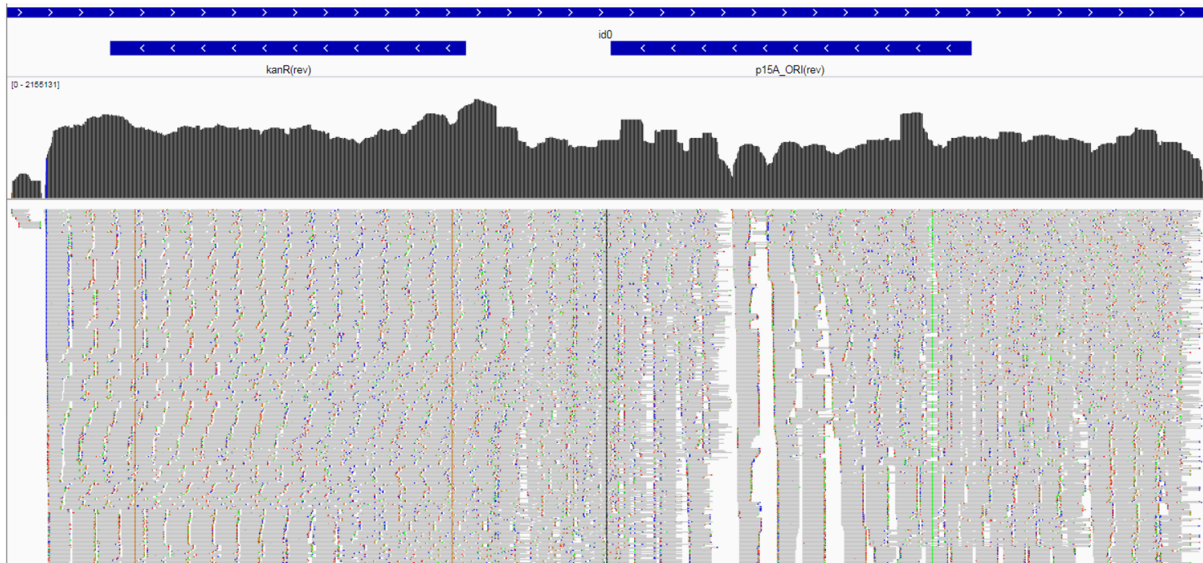

### E S5: AND-gate in pSB4K5

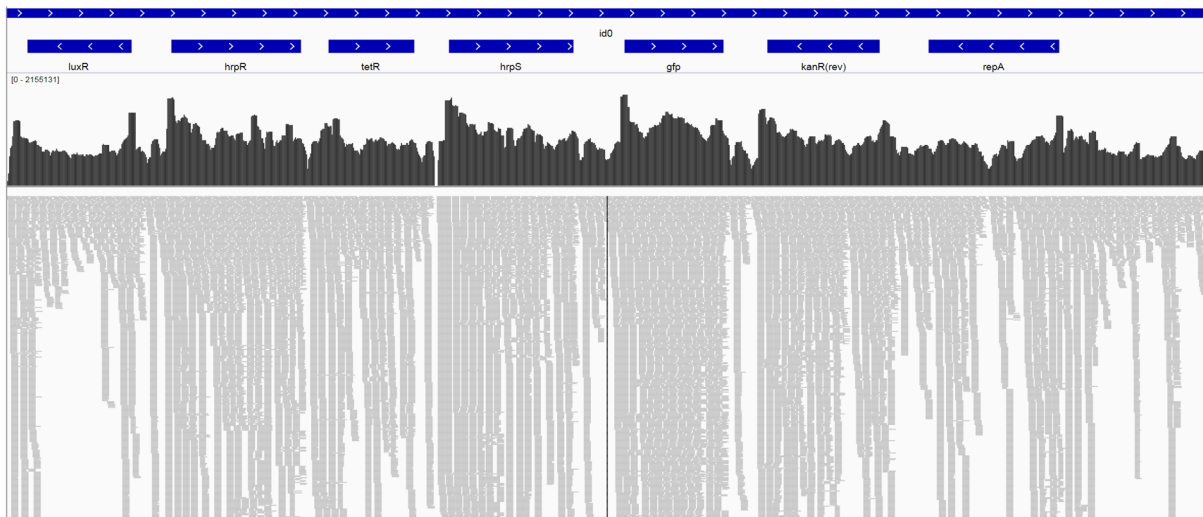

### F S6: Inputs-gfp in pSB4K5

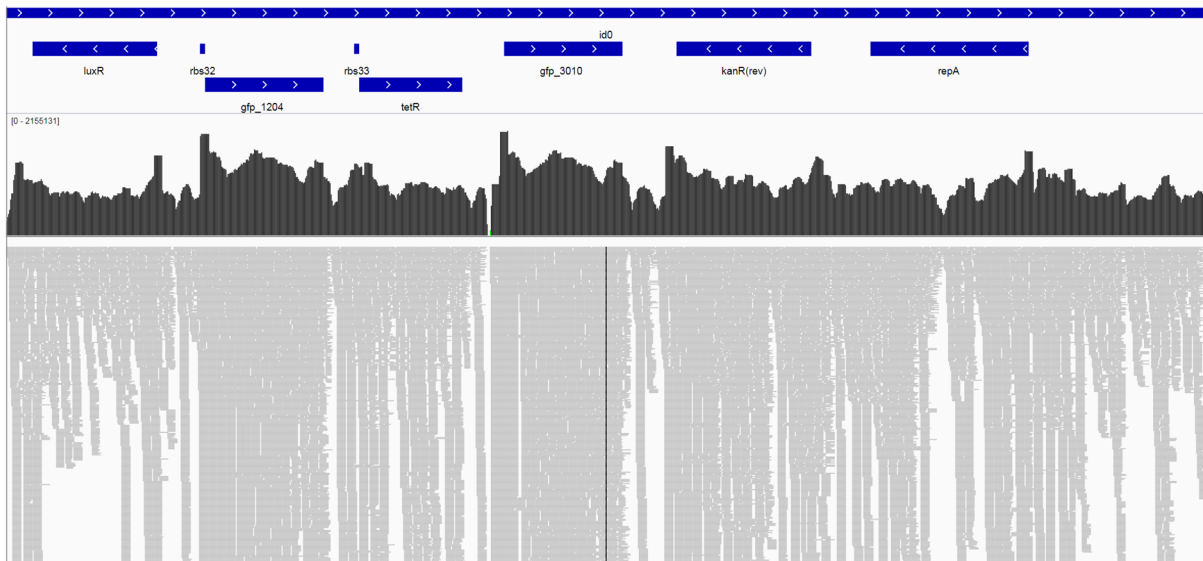

## G S7: pSB4K5

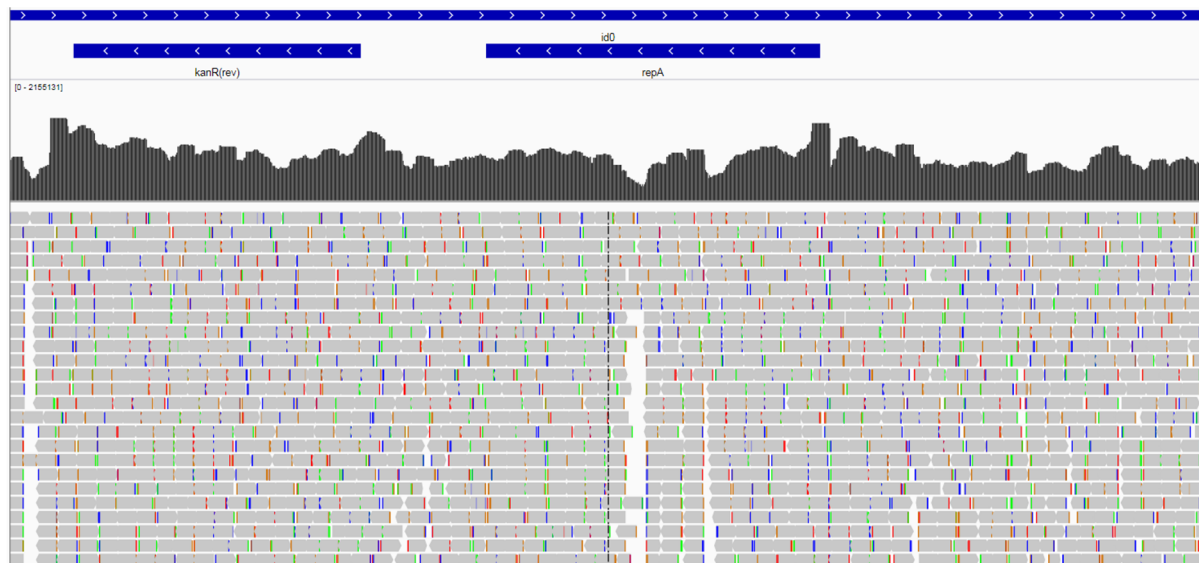

**Figure S5.** Full mapped transcription profiles and RNA-Seq reads of all the genes in the circuit-hosting plasmids under different conditions for all seven samples S1-S7 (A-G). Read mapping were visualized using the Integrative Genomics Viewer tool (IGV)<sup>2</sup>.

### 3.3 Expression of other genes in the circuit-hosting plasmids

Figure S6 shows the transcription profiles of the antibiotic resistance and origin of replication control genes in the circuit-hosting plasmids under different circuit conditions. Clearly the expression levels of the antibiotics resistance gene (*kan<sup>R</sup>*) and copy control related genes (*p15A* for *pSB3K3*, *repA* for *pSB4K5*) in the samples containing medium-copy number plasmid (S1-S4) are significantly higher (3-5 times) than those in samples (S5-S7) containing the low-copy number plasmid. The copy number of medium-copy *pSB3K3* is around 3~4 times that of the low-copy *pSB4K5*, consistent with the expression ratios (RPKM values) of *p15A* and *repA* in the two plasmids across all samples (Figure S6).

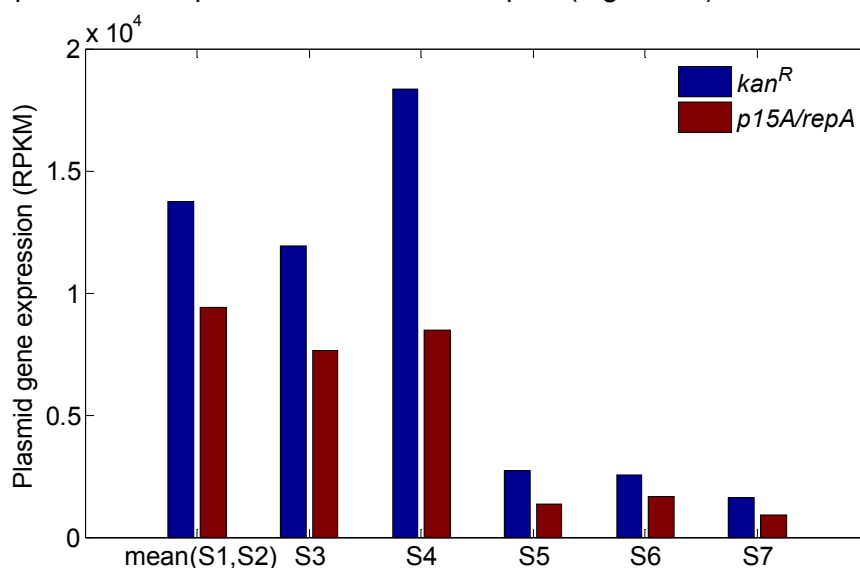

**Figure S6.** Transcription profiles of the antibiotic resistance and origin of replication control genes in the circuit-hosting plasmids under different conditions.

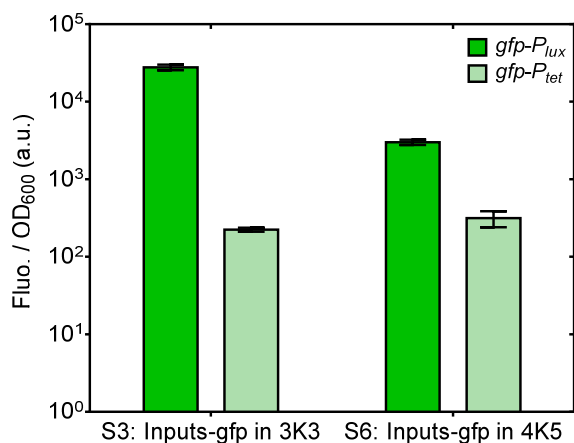

**Figure S7. GFP reporter expression under the two inducible promoters in the Inputs-*gfp* circuit hosted in the two plasmids pSB3K3 and pSB4K5.** Green bars are the condition when sample cultures were induced with 100 nM AHL, and light green bars are the condition when sample cultures were induced with 20 ng/ml aTc. Cells were grown in M9-glycerol media at 37 °C and assayed 4 hr after induction using a fluorescent microplate reader. Error bars, s.d. (n = 3). a.u., arbitrary units.

### 3.4 Identification of differentially expressed genes

To minimize potential false positives, two parallel methods were used to find and cross-validate differentially expressed genes between compared conditions.

The first method used is the combined 2-fold expression change detection and  $\chi^2$ -test. Differentially expressed genes were determined when both the expression levels (RPKM values) between compared conditions having more than 2-fold difference and the p-value < 0.05 from the  $\chi^2$ -test. The results are listed in the file named *list\_of\_Chi-Test\_DEGs\_s2.xls*.

For the second method, the software edgeR<sup>3</sup> was used. edgeR identifies the DEGs from statistical test, hence suitable not only for the samples with biological duplication but also for the case without repeats. The biological duplicate samples are used to calculate the dispersion of gene expression levels, which is then used in the normalization of all other gene expression. Since duplicate is available for one circuit condition, as suggested by edgeR, we used the duplicate samples to calculate the dispersion value in the experiment which was subsequently adopted for all other paired comparison analysis to screen out the DEGs. Here, we calculated the dispersion value 0.0252 from the two duplicate samples (S1 and S2: AND-gate in pSB3K3). The results are listed in the file named *list\_of\_edgeR\_DEGs\_s3.xls*.

We then integrated the results from the above two methods to obtain the cross-validated intersection set of identified DEGs (Table 3), as listed in the file *final\_DEGs.xls*.

## 4. Functional analysis of the identified differentially expressed genes

The online tool DAVID<sup>4, 5</sup> was used for the functional enrichment analysis among the identified overlapped differentially expressed genes (Table 3). Gene functions were retrieved from the GO biological process and KEGG pathway databases. The results (Table S4 and S5) show that a few specific biological processes were affected by the heterologous genetic circuits as well as by the copy number variation of their hosting plasmid(s).

Table S3. Function annotations of DEGs in comparisons between circuit-hosting plasmids of different copy number

| Functional Catalogues                    | C5: S1/2 vs S5 (129 genes)                                                                                                                                                                                                                                                                                          | C6: S3 vs S6 (273 genes)                                                                                                                                                                                                                                                                                                                                                                                      | C7: S4 vs S7(627 genes)                                                                                                                                                                                                                                                                                                                                                                                                                                                |                                                                                                                                                                                                                                                                                                                                                                                                                                                                                                                                                                                  |
|------------------------------------------|---------------------------------------------------------------------------------------------------------------------------------------------------------------------------------------------------------------------------------------------------------------------------------------------------------------------|---------------------------------------------------------------------------------------------------------------------------------------------------------------------------------------------------------------------------------------------------------------------------------------------------------------------------------------------------------------------------------------------------------------|------------------------------------------------------------------------------------------------------------------------------------------------------------------------------------------------------------------------------------------------------------------------------------------------------------------------------------------------------------------------------------------------------------------------------------------------------------------------|----------------------------------------------------------------------------------------------------------------------------------------------------------------------------------------------------------------------------------------------------------------------------------------------------------------------------------------------------------------------------------------------------------------------------------------------------------------------------------------------------------------------------------------------------------------------------------|
| <b>Transport (GO_BP)</b>                 | ion transport (18)<br>electron transport chain (9)                                                                                                                                                                                                                                                                  | ion transport (38)<br>electron transport chain (13)<br>organic acid transport (8)<br>carbohydrate transport (14)                                                                                                                                                                                                                                                                                              | ion transport (46)<br>electron transport chain (18)<br>organic acid transport (10)<br>carbohydrate transport (24)<br>phosphonate transport (5)                                                                                                                                                                                                                                                                                                                         |                                                                                                                                                                                                                                                                                                                                                                                                                                                                                                                                                                                  |
| <b>Transport (KEGG Pathways)</b>         | ABC transporters (13)                                                                                                                                                                                                                                                                                               | ABC transporters (31)<br>Phosphotransferase system (PTS) (3)                                                                                                                                                                                                                                                                                                                                                  | ABC transporters (29)<br>Phosphotransferase system (PTS) (8)                                                                                                                                                                                                                                                                                                                                                                                                           |                                                                                                                                                                                                                                                                                                                                                                                                                                                                                                                                                                                  |
| <b>Membrane (SP_PIR_KEYWORD S)</b>       | membrane (47)                                                                                                                                                                                                                                                                                                       | membrane (95)                                                                                                                                                                                                                                                                                                                                                                                                 | membrane (187)                                                                                                                                                                                                                                                                                                                                                                                                                                                         |                                                                                                                                                                                                                                                                                                                                                                                                                                                                                                                                                                                  |
| <b>Metabolic process (in GO_BP)</b>      | amine biosynthetic process (9)<br>catechol metabolic process (4)<br>phenol metabolic process (4)<br>diol metabolic process (4)<br>cofactor biosynthetic process (6)<br>nitrogen compound biosynthetic process (12)<br>energy derivation by oxidation of organic compounds (9)<br>tryptophan biosynthetic process(4) | amine biosynthetic process (13)<br>catechol metabolic process (5)<br>phenol metabolic process (5)<br>diol metabolic process (5)<br>cofactor biosynthetic process (9)<br>nitrogen compound biosynthetic process (20)<br>energy derivation by oxidation of organic compounds (20)<br>cellular respiration (18)<br>generation of precursor metabolites and energy (25)<br>organic acid biosynthetic process (14) | amine biosynthetic process (18)<br>catechol metabolic process (5)<br>phenol metabolic process (5)<br>diol metabolic process (5)<br>cofactor biosynthetic process (11)<br>nitrogen compound biosynthetic process (28)<br>energy derivation by oxidation of organic compounds (24)<br>cellular respiration (21)<br>generation of precursor metabolites and energy (31)<br>organic acid biosynthetic process (17)<br>cellular amino acid derivative metabolic process (9) | organophosphate metabolic process (9)<br>alditol metabolic process (7)<br>polyol metabolic process (7)<br>glycerol metabolic process (5)<br>colanic acid biosynthetic process (6)<br>polysaccharide metabolic process (22)<br>carbohydrate biosynthetic process (21)<br>nucleobase metabolic process (7)<br>phospholipid metabolic process (7)<br>phosphorus metabolic process (17)<br>lipid biosynthetic process (16)<br>lipopolysaccharide metabolic process (13)<br>indolalkylamine biosynthetic process (4)<br>fatty acid metabolic process (11)<br>oxidation reduction (50) |
| <b>metabolic process (KEGG Pathways)</b> | biosynthesis of siderophore group nonribosomal peptides (4)<br>Purine metabolism (3)<br>Nitrogen metabolism (3)<br>Phenylalanine, tyrosine and tryptophan biosynthesis (3)                                                                                                                                          | biosynthesis of siderophore group nonribosomal peptides (5)<br>Purine metabolism (6)<br>Glycerophospholipid metabolism (5)<br>Fructose and mannose metabolism(4)<br>Nitrogen metabolism (6)<br>Citrate cycle (TCA cycle) (3)<br>Glyoxylate and dicarboxylate metabolism (4)<br>Valine, leucine and isoleucine biosynthesis (3)<br>Alanine, aspartate and glutamate metabolism (3)                             | biosynthesis of siderophore group nonribosomal peptides (5)<br>Purine metabolism (9)<br>Glycerophospholipid metabolism (5)<br>Fructose and mannose metabolism (6)<br>Pentose and glucuronate interconversions (6)                                                                                                                                                                                                                                                      | Galactose metabolism (7)<br>Propanoate metabolism (5)<br>Benzoate degradation via CoA ligation (4)<br>Butanoate metabolism (3)                                                                                                                                                                                                                                                                                                                                                                                                                                                   |
| <b>Regulation (GO_BP)</b>                | regulation of transcription (7)<br>regulation of RNA metabolic process (5)                                                                                                                                                                                                                                          | regulation of transcription (10)<br>regulation of RNA metabolic process (9)                                                                                                                                                                                                                                                                                                                                   | regulation of transcription (54)<br>regulation of RNA metabolic process (46)                                                                                                                                                                                                                                                                                                                                                                                           | cell division (6)                                                                                                                                                                                                                                                                                                                                                                                                                                                                                                                                                                |
| <b>Signal (KEGG Pathways)</b>            | Two-component system (8)                                                                                                                                                                                                                                                                                            | Two-component system (6)                                                                                                                                                                                                                                                                                                                                                                                      | Two-component system (26)                                                                                                                                                                                                                                                                                                                                                                                                                                              |                                                                                                                                                                                                                                                                                                                                                                                                                                                                                                                                                                                  |
| <b>Others (GO_BP)</b>                    | protein complex assembly (7)<br>viral infectious cycle (3)                                                                                                                                                                                                                                                          | protein complex assembly (7)<br>Bacterial chemotaxis (3)                                                                                                                                                                                                                                                                                                                                                      | protein complex assembly (10)<br>Bacterial chemotaxis (3)                                                                                                                                                                                                                                                                                                                                                                                                              | response to abiotic stimulus (9)<br>Flagellar assembly (5), cell adhesion (12),                                                                                                                                                                                                                                                                                                                                                                                                                                                                                                  |

Table S4. Function annotations of DEGs in comparisons between different circuit compositions

| Copy number     | AND-gate vs. Inputs- <i>gfp</i><br>(mid-copy C2=#25, low-copy C8=#8)                                                                                                                                                                                                                                                                                                                                                                                                                              | AND-gate vs. empty plasmid<br>(mid-copy C4=#41, low-copy C10=#42)                                                                                                                                                                                                                                                                                                                                                                                                                                                                                                                                                                                                                                                                                                    | Inputs- <i>gfp</i> vs. empty plasmid<br>(mid-copy C3=#46, low-copy C9=#62)                                                                                                                                                                                                                                                                                                                                                                                                                                                                                                                                                                                                                                                                                                                                                                                                                                                                                                                                          | Function annotation sources |
|-----------------|---------------------------------------------------------------------------------------------------------------------------------------------------------------------------------------------------------------------------------------------------------------------------------------------------------------------------------------------------------------------------------------------------------------------------------------------------------------------------------------------------|----------------------------------------------------------------------------------------------------------------------------------------------------------------------------------------------------------------------------------------------------------------------------------------------------------------------------------------------------------------------------------------------------------------------------------------------------------------------------------------------------------------------------------------------------------------------------------------------------------------------------------------------------------------------------------------------------------------------------------------------------------------------|---------------------------------------------------------------------------------------------------------------------------------------------------------------------------------------------------------------------------------------------------------------------------------------------------------------------------------------------------------------------------------------------------------------------------------------------------------------------------------------------------------------------------------------------------------------------------------------------------------------------------------------------------------------------------------------------------------------------------------------------------------------------------------------------------------------------------------------------------------------------------------------------------------------------------------------------------------------------------------------------------------------------|-----------------------------|
| <b>Mid-copy</b> | tryptophan biosynthetic process (3)<br>carboxylic acid biosynthetic process (5)<br>nitrogen compound biosynthetic process (5)<br>oxidation reduction (5)<br>cellular amino acid biosynthetic process (5)<br>indole derivative biosynthetic process (3)<br>indolalkylamine biosynthetic process (3)<br>aromatic amino acid family biosynthetic process (3)<br>heterocycle biosynthetic process (5)<br>dicarboxylic acid metabolic process (3)<br>generation of precursor metabolites and energy(4) | tryptophan biosynthetic process (4)<br>carboxylic acid biosynthetic process (13)<br>nitrogen compound biosynthetic process (13)<br>oxidation reduction (4)<br>cellular amino acid biosynthetic process (13)<br>indole derivative biosynthetic process (4)<br>indolalkylamine biosynthetic process (4)<br>aromatic amino acid family biosynthetic process (4)<br>heterocycle biosynthetic process (4)<br>dicarboxylic acid metabolic process (4)<br>chorismate metabolic process (4)<br>ion transport (5)<br>biogenic amine biosynthetic process (4)<br>sulfur metabolic process (10)<br>sulfate assimilation (5)<br>serine family amino acid biosynthetic process (5)<br>cysteine biosynthetic process (4)<br>sulfate transport (4)<br>inorganic anion transport (4) | tryptophan biosynthetic process (3)<br>carboxylic acid biosynthetic process (11)<br>nitrogen compound biosynthetic process (15)<br>oxidation reduction (6)<br>cellular amino acid biosynthetic process (10)<br>indole derivative biosynthetic process (3)<br>indolalkylamine biosynthetic process (3)<br>aromatic amino acid family biosynthetic process (3)<br>heterocycle biosynthetic process (4)<br>dicarboxylic acid metabolic process (3)<br>generation of precursor metabolites and energy (5)<br>chorismate metabolic process (3)<br>ion transport (4)<br>organic acid biosynthetic process (11)<br>nucleotide biosynthetic process (6)<br>glutamine family amino acid metabolic process (4)<br>purine nucleotide biosynthetic process (3)<br>ribonucleoside monophosphate biosynthetic process (3)<br>nucleoside monophosphate biosynthetic process (3)<br>cellular amino acid derivative biosynthetic process (3)<br>energy derivation by oxidation of organic compounds (5)<br>anaerobic respiration (3) | GO Biological Processes     |
|                 | Two-component system (3)<br>Phenylalanine, tyrosine and tryptophan biosynthesis (3)                                                                                                                                                                                                                                                                                                                                                                                                               | Two-component system (3)<br>Alanine, aspartate and glutamate metabolism (3)<br>ABC transporters (6)<br>Sulfur metabolism (6)<br>Selenoamino acid metabolism (3)<br>Phenylalanine, tyrosine and tryptophan biosynthesis (3)                                                                                                                                                                                                                                                                                                                                                                                                                                                                                                                                           | Two-component system (4)<br>Alanine, aspartate and glutamate metabolism (5)<br>ABC transporters (5)<br>Purine metabolism (5)<br>Pyrimidine metabolism (3)                                                                                                                                                                                                                                                                                                                                                                                                                                                                                                                                                                                                                                                                                                                                                                                                                                                           | KEGG pathways               |
| <b>Low-copy</b> | fatty acid oxidation (2)                                                                                                                                                                                                                                                                                                                                                                                                                                                                          | metal ion transport (12)<br>enterobactin biosynthetic process (4)<br>siderophore biosynthetic process from catechol (4)<br>nonribosomal peptide biosynthetic process (4)<br>phenol metabolic process (4)<br>diol metabolic process (4)<br>cofactor biosynthetic process (4)<br>fatty acid oxidation (3)<br>aromatic amino acid family biosynthetic process (3)<br>nitrogen compound biosynthetic process (4)<br>carboxylic acid biosynthetic process (3)                                                                                                                                                                                                                                                                                                             | ion transport (5) metal ion transport (4)<br>aromatic amino acid family biosynthetic process (4)<br>tryptophan biosynthetic process (3)<br>indole derivative biosynthetic process (3)<br>indolalkylamine biosynthetic process (3)<br>dicarboxylic acid metabolic process (4)<br>nitrogen compound biosynthetic process (6)<br>carboxylic acid biosynthetic process (5)<br>amine biosynthetic process (5)<br>regulation of transcription (7)                                                                                                                                                                                                                                                                                                                                                                                                                                                                                                                                                                         | GO Biological Processes     |
|                 | Two-component system (3)                                                                                                                                                                                                                                                                                                                                                                                                                                                                          | Two-component system (10)<br>Biosynthesis of siderophore group nonribosomal peptides (4)                                                                                                                                                                                                                                                                                                                                                                                                                                                                                                                                                                                                                                                                             | Two-component system (10)                                                                                                                                                                                                                                                                                                                                                                                                                                                                                                                                                                                                                                                                                                                                                                                                                                                                                                                                                                                           | KEGG pathways               |

## 5. List of host genes of specific functional categories analyzed in this study

In this study we studied the effect of the imported genetic circuits on the host cell, including the change of expression levels of resource related genes, transcription regulatory genes, housekeeping genes and essential genes.

### 5.1 Resource related genes

These include the DNA polymerases (Table S5), RNA polymerases (Table S6), transcription termination factors (Table S7), other transcription related genes (Table S8), ribosome and tRNA genes (see the file tRNA\_related\_genes.xls) and translation related genes (see the file translation\_related\_genes.xls).

Table S5. List of DNA polymerases genes (retrieved from NCBI database)

| Symbol      | Alias                                             | Description                                                                                   | Start position | End position | Orientation |
|-------------|---------------------------------------------------|-----------------------------------------------------------------------------------------------|----------------|--------------|-------------|
| <i>polA</i> | b3863, ECK3855, JW3835, <i>resA</i>               | fused DNA polymerase I 5'->3' polymerase/3'->5' exonuclease/5'->3' exonuclease                | 4046966        | 4049752      | plus        |
| <i>dinB</i> | b0231, ECK0232, JW0221, <i>dinP</i>               | DNA polymerase IV                                                                             | 250898         | 251953       | plus        |
| <i>dnaX</i> | b0470, ECK0464, JW0459, <i>dnaZ</i>               | DNA polymerase III/DNA elongation factor III, tau and gamma subunits                          | 492092         | 494023       | plus        |
| <i>umuD</i> | b1183, ECK1171, JW1172                            | DNA polymerase V, subunit D                                                                   | 1230767        | 1231186      | plus        |
| <i>dnaN</i> | b3701, ECK3693, JW3678                            | DNA polymerase III, beta subunit                                                              | 3881221        | 3882321      | minus       |
| <i>umuC</i> | b1184, ECK1172, JW1173, <i>uvm</i>                | DNA polymerase V, subunit C                                                                   | 1231186        | 1232454      | plus        |
| <i>dnaE</i> | b0184, ECK0183, JW0179, <i>polC</i> , <i>sdgC</i> | DNA polymerase III alpha subunit                                                              | 205126         | 208608       | plus        |
| <i>polB</i> | b0060, ECK0061, JW0059, <i>dinA</i>               | DNA polymerase II                                                                             | 63429          | 65780        | minus       |
| <i>dnaQ</i> | b0215, ECK0215, JW0205, <i>mutD</i>               | DNA polymerase III epsilon subunit                                                            | 236067         | 236798       | plus        |
| <i>holA</i> | b0640, ECK0633, JW0635                            | DNA polymerase III, delta subunit                                                             | 670574         | 671605       | minus       |
| <i>holB</i> | b1099, ECK1085, JW1085                            | DNA polymerase III, delta prime subunit                                                       | 1155762        | 1156766      | plus        |
| <i>holE</i> | b1842, ECK1843, JW1831                            | DNA polymerase III, theta subunit                                                             | 1925108        | 1925338      | plus        |
| <i>holC</i> | b4259, ECK4252, JW4216                            | DNA polymerase III, chi subunit                                                               | 4483837        | 4484280      | minus       |
| <i>holD</i> | b4372, ECK4363, JW4334                            | DNA polymerase III, psi subunit                                                               | 4607803        | 4608216      | plus        |
| <i>dnaC</i> | b4361, ECK4351, JW4325, <i>dnaD</i>               | DNA biosynthesis protein                                                                      | 4600238        | 4600975      | minus       |
| <i>dnaA</i> | b3702, ECK3694, JW3679, <i>hsm-2</i>              | chromosomal replication initiator protein<br>DnaA, DNA-binding transcriptional dual regulator | 3882326        | 3883729      | minus       |
| <i>radA</i> | b4389, ECK4381, JW4352, <i>sms</i>                | DNA repair protein                                                                            | 4625912        | 4627294      | plus        |

Table S6. List of RNA polymerases genes (retrieved from NCBI database)

| Symbol      | Alias                                                                                                                                                                        | Description                   | Start position | End position | Orientation |
|-------------|------------------------------------------------------------------------------------------------------------------------------------------------------------------------------|-------------------------------|----------------|--------------|-------------|
| <i>rpoA</i> | b3295, ECK3282, JW3257, <i>pez</i> , <i>phs</i> , <i>sez</i>                                                                                                                 | RNA polymerase, alpha subunit | 3440039        | 3441028      | minus       |
| <i>rpoB</i> | b3987, ECK3978, JW3950, <i>ftsR</i> , <i>groN</i> , <i>mbrD?</i> , <i>nitB</i> , <i>rif</i> , <i>ron</i> , <i>sdgB</i> , <i>stl</i> , <i>stv</i> , <i>tabD</i> , <i>tabG</i> | RNA polymerase, beta subunit  | 4181244        | 4185272      | plus        |

|             |                                                                                                                                      |                                                                                                             |         |         |       |
|-------------|--------------------------------------------------------------------------------------------------------------------------------------|-------------------------------------------------------------------------------------------------------------|---------|---------|-------|
| <i>rpoC</i> | b3988, ECK3979, JW3951, <i>tabB</i>                                                                                                  | RNA polymerase, beta prime subunit                                                                          | 4185349 | 4189572 | plus  |
| <i>rpoZ</i> | b3649, ECK3639, JW3624, <i>spoS</i>                                                                                                  | RNA polymerase, omega subunit                                                                               | 3822105 | 3822380 | plus  |
| <i>rpoD</i> | b3067, ECK3057, JW3039, <i>alt</i>                                                                                                   | RNA polymerase, sigma 70 (sigma D) factor                                                                   | 3213046 | 3214887 | plus  |
| <i>rpoE</i> | b2573, ECK2571, JW2557, <i>sigE</i>                                                                                                  | RNA polymerase, sigma 24 (sigma E) factor                                                                   | 2709436 | 2710011 | minus |
| <i>rpoH</i> | b3461, ECK3445, JW3426, <i>fam</i> , <i>hin</i> , <i>htpR</i>                                                                        | RNA polymerase, sigma 32 (sigma H) factor                                                                   | 3599928 | 3600782 | minus |
| <i>rpoN</i> | b3202, ECK3191, JW3169, <i>glnF</i> , <i>ntrA</i>                                                                                    | RNA polymerase, sigma 54 (sigma N) factor                                                                   | 3344716 | 3346149 | plus  |
| <i>rpoS</i> | b2741, ECK2736, JW5437, <i>abrD</i> , <i>appR</i> , <i>csi2</i> , <i>dpeB</i> , <i>katF</i> , <i>nur</i> , <i>otsX</i> , <i>sigS</i> | RNA polymerase, sigma S (sigma 38) factor                                                                   | 2866558 | 2867550 | minus |
| <i>fecl</i> | b4293, ECK4283, JW4253                                                                                                               | KpLE2 phage-like element; RNA polymerase, sigma 19 factor                                                   | 4517713 | 4518234 | minus |
| <i>fliA</i> | b1922, ECK1921, JW1907, <i>flaD</i> , <i>rpoF</i>                                                                                    | RNA polymerase, sigma 28 (sigma F) factor                                                                   | 2001069 | 2001788 | minus |
| <i>rseA</i> | b2572, ECK2570, JW2556, <i>mclA</i> , <i>yfiJ</i>                                                                                    | anti-sigma factor                                                                                           | 2708753 | 2709403 | minus |
| <i>rseB</i> | b2571, ECK2569, JW2555                                                                                                               | anti-sigma E factor, binds RseA                                                                             | 2707798 | 2708754 | minus |
| <i>flgM</i> | b1071, ECK1056, JW1058, <i>mviS</i>                                                                                                  | anti-sigma factor for FliA (sigma 28)                                                                       | 1129835 | 1130128 | minus |
| <i>rapA</i> | b0059, ECK0060, JW0058, <i>hepA</i> , <i>yabA</i>                                                                                    | RNA polymerase remodeling/recycling factor ATPase; RNA polymerase-associated, ATP-dependent RNA translocase | 60357   | 63263   | minus |

Table S7. List of transcription termination factor genes (retrieved from NCBI database)

| Symbol      | Aliases                                                                                                                                          | Description                                        | Start position | End position | Orientation |
|-------------|--------------------------------------------------------------------------------------------------------------------------------------------------|----------------------------------------------------|----------------|--------------|-------------|
| <i>rho</i>  | b3783, ECK3775, JW3756, <i>hdf</i> , <i>nitA</i> , <i>nusD</i> , <i>psuA</i> , <i>rnsC</i> , <i>sbaA</i> , <i>sun</i> , <i>tabC</i> , <i>tsu</i> | transcription termination factor                   | 3966416        | 3967675      | plus        |
| <i>greA</i> | b3181, ECK3170, JW3148                                                                                                                           | transcript cleavage factor                         | 3328238        | 3328714      | minus       |
| <i>greB</i> | b3406, ECK3393, JW3369                                                                                                                           | transcript cleavage factor                         | 3536811        | 3537287      | plus        |
| <i>nusA</i> | b3169, ECK3158, JW3138                                                                                                                           | transcription termination/antitermination L factor | 3316038        | 3317525      | minus       |
| <i>nusB</i> | b0416, ECK0410, JW0406, <i>groNB</i> , <i>ssaD</i> , <i>ssyB</i>                                                                                 | transcription antitermination protein              | 435137         | 435556       | plus        |
| <i>nusG</i> | b3982, ECK3973, JW3945                                                                                                                           | transcription termination factor                   | 4177742        | 4178287      | plus        |



Table S8. List of other transcription related genes (retrieved from NCBI database)

| Symbol      | Alias                                                                                                                                                | Description                                                     | Start position | End position | Orientation |
|-------------|------------------------------------------------------------------------------------------------------------------------------------------------------|-----------------------------------------------------------------|----------------|--------------|-------------|
| <i>ruvA</i> | b1861, ECK1862, JW1850                                                                                                                               | component of RuvABC resolvasome, regulatory subunit             | 1945364        | 1945975      | minus       |
| <i>ruvB</i> | b1860, ECK1861, JW1849                                                                                                                               | ATP-dependent DNA helicase, component of RuvABC resolvasome     | 1944345        | 1945355      | minus       |
| <i>ruvC</i> | b1863, ECK1864, JW1852                                                                                                                               | component of RuvABC resolvasome, endonuclease                   | 1946854        | 1947375      | minus       |
| <i>rep</i>  | b3778, ECK3770, JW5604, <i>dasC</i> , <i>mbrA</i> , <i>mmrA</i>                                                                                      | DNA helicase and single-stranded DNA-dependent ATPase           | 3960676        | 3962697      | plus        |
| <i>uvrD</i> | b3813, ECK3808, JW3786, <i>dar-2</i> , <i>dda</i> , <i>mutU</i> , <i>pdeB</i> , <i>rad</i> , <i>recL</i> , <i>srjC</i> , <i>uvr502</i> , <i>uvrE</i> | DNA-dependent ATPase I and helicase II                          | 3997982        | 4000144      | plus        |
| <i>dnaB</i> | b4052, ECK4044, JW4012, <i>groP</i> , <i>grpA</i> , <i>grpD</i>                                                                                      | replicative DNA helicase                                        | 4264314        | 4265729      | plus        |
| <i>pcnB</i> | b0143, ECK0142, JW5808                                                                                                                               | poly(A) polymerase                                              | 157729         | 159126       | minus       |
| <i>mfd</i>  | b1114, ECK1100, JW1100                                                                                                                               | transcription-repair coupling factor                            | 1170517        | 1173963      | minus       |
| <i>rsd</i>  | b3995, ECK3987, JW3959, <i>yjaE</i>                                                                                                                  | stationary phase protein, binds sigma 70 RNA polymerase subunit | 4196331        | 4196807      | minus       |
| <i>mfd</i>  | b1114, ECK1100, JW1100                                                                                                                               | transcription-repair coupling factor                            | 1170518        | 1173964      | minus       |

## 5.2 The expression of transcription factors

We also studied the expression levels of transcription factors as downloaded from database RegulonDB<sup>6</sup> (Version 8.0). There are 162 transcription factors in total as listed in file regulonDB\_TFs.xls and their expression levels among all samples are shown in Figure 4D.

## 5.3 The expression of housekeeping genes

The expression levels of housekeeping genes are generally constant in various conditions. Here, we studied the expression of 39 housekeeping genes (Table S9) as reported before in the reference<sup>7</sup>.

Table S9. List of housekeeping genes

| Symbol      | description                                  | Symbol      | description                                     |
|-------------|----------------------------------------------|-------------|-------------------------------------------------|
| <i>mdoG</i> | Glucan biosynthesis protein G                | <i>tolB</i> | Periplasmic protein                             |
| <i>dapA</i> | Dihydrodipicolinate synthase                 | <i>mrc</i>  | RNase III                                       |
| <i>crp</i>  | DNA-binding transcriptional dual regulator   | <i>ntpA</i> | Dihydroneopterin triphosphate pyrophosphatase   |
| <i>hslV</i> | Peptidase component of the HslUV protease    | <i>yabB</i> | Conserved protein, MraZ family                  |
| <i>mrdB</i> | Cell wall shape-determining protein          | <i>lolA</i> | Chaperone for lipoproteins                      |
| <i>fucU</i> | L-Fucose mutarotase                          | <i>yggD</i> | Predicted DNA-binding transcriptional regulator |
| <i>yjgP</i> | LPS transport (lptF)                         | <i>pnp</i>  | Polynucleotide phosphorylase/polyadenylase      |
| <i>yigC</i> | 3-Octaprenyl-4-hydroxybenzoate decarboxylase | <i>xerC</i> | Site-specific tyrosine recombinase              |

|             |                                                                                                  |             |                                                                                    |
|-------------|--------------------------------------------------------------------------------------------------|-------------|------------------------------------------------------------------------------------|
| <i>gor</i>  | Glutathione oxidoreductase                                                                       | <i>rfaF</i> | ADP-heptose:LPS heptosyltransferase II                                             |
| <i>hflB</i> | ATP-dependent metalloprotease                                                                    | <i>yigP</i> | Conserved protein, SCP2 family                                                     |
| <i>yqiB</i> | Predicted dehydrogenase                                                                          | <i>gyrB</i> | DNA gyrase, subunit B                                                              |
| <i>murG</i> | N-Acetylglucosaminyl transferase                                                                 | <i>nrdR</i> | Conserved protein                                                                  |
| <i>yrbG</i> | Predicted calcium/sodium:proton antiporter                                                       | <i>hemD</i> | Uroporphyrinogen III synthase                                                      |
| <i>yejK</i> | Nucleotide associated protein                                                                    | <i>pheT</i> | Phenylalanine tRNA synthetase, beta subunit                                        |
| <i>yfgA</i> | Cytoskeletal protein required for MreB assembly                                                  | <i>frr</i>  | Ribosome recycling factor                                                          |
| <i>hflX</i> | Putative GTPase HflX                                                                             | <i>holC</i> | DNA polymerase III, chi subunit                                                    |
| <i>cls</i>  | Cardiolipin synthase 1                                                                           | <i>xerD</i> | Site-specific tyrosine recombinase                                                 |
| <i>nagC</i> | DNA-binding transcriptional dual regulator,<br>repressor of N-acetylglucosamine                  | <i>yheS</i> | Fused predicted transporter subunits of ABC<br>superfamily: ATP-binding components |
| <i>spoT</i> | Bifunctional (p)ppGpp synthetase<br>II/guanosine-3,5-bis pyrophosphate<br>3-pyrophosphohydrolase | <i>sun</i>  | 16S rRNA m(5)C967<br>methyltransferase,S-adenosyl-L-methionine-dependent           |
| <i>yrbB</i> | ABC transporter maintaining OM lipid<br>asymmetry,cytoplasmic STAS component                     |             |                                                                                    |

---

#### 5.4 The expression of essential genes in the host

Essential genes used in this study are referred from the database DEG<sup>8</sup>. These genes are listed in the file named `essential_genes_collect.xls`, available in the supplementary excel file (`Supplementary_file_list_of_grouped_host_genes_s1`).

## 6. List of genetic part sequences used in the study

**Table S10. List of genetic parts, circuit and plasmid backbone sequences used in this study** (promoters are in red, RBSs are in italic and bold, protein coding sequences are in brown and terminators are in bold)

| Part name                                                          | Type and source                                                          | DNA sequence (5'– 3')                                                                                                                                                                                                                                                                                                                                                                                                                                                                                                                                                                                                                                                                                                                                                                                                                                                                                                                                                                                                                                                                                                   |
|--------------------------------------------------------------------|--------------------------------------------------------------------------|-------------------------------------------------------------------------------------------------------------------------------------------------------------------------------------------------------------------------------------------------------------------------------------------------------------------------------------------------------------------------------------------------------------------------------------------------------------------------------------------------------------------------------------------------------------------------------------------------------------------------------------------------------------------------------------------------------------------------------------------------------------------------------------------------------------------------------------------------------------------------------------------------------------------------------------------------------------------------------------------------------------------------------------------------------------------------------------------------------------------------|
| <i>P<sub>J114</sub>-rbs30-tetR-B0015-<br/>P<sub>tet2</sub></i>     | Inducible promoter with TetR receptor (de novo synthesized) <sup>9</sup> | <p><b>TTTATGGCTAGCTCAGTCCTAGGTACAATGCTAGCTACTAGAGATTAAAGAGGAGAAA</b>TACCATATGTCCAGATTAGATAAAAAGTAAAGTGATTAACAGCGCATTAGAGCTGCTTAATGAGGTCGGAATCGAAGGTTTAAACAACCCGTAAACTCGCCCA GAAGCTAGGTGTAGAGCAGCCTACATTGTATTGGCATGTAAAAATAAGCGGG CTTTGCTCGACGCCTTAGCCATTGAGATGTTAGATAGGCACCATACTCACTTT TGCCCTTTAGAAAGGGGAAAGCTGGCAAGATTTTTTACGTAATAACGCTAAAAG TTTTAGATGTGCTTTACTAAGTCATCGCGATGGAGCAAAAGTACATTTAGGTA CACGGCCTACAGAAAAACAGTATGAAACTCTCGAAAATCAATTAGCCTTTTTTA TGCCAAACAAGGTTTTTCACTAGAGAATGCATTATATGCACCTCAGCGCTGTGGG GCATTTTACTTTAGGTTGCGTATTGGAAGATCAAGAGCATCAAGTCGCTAAAG AAGAAAGGGAAACACCTACTACTGATAGTATGCCGCCATTATTACGACAAGCT ATCGAATTATTTGATCACCAAGGTGCAGAGCCAGCCTTCTTATTCGGCCTTGA ATTGATCATTGCGGATTAGAAAAACAACTTAAATGTGAAAGTGGGTCCTAAT AATACTAGAGCCAGGCATCAAATAAACGAAAGGCTCAGTCGAAAGACTGGGC CTTTCGTTTTATCTGTTGTTTGTGCGGTGAACGCTCTCTACTAGAGTCACACTG GCTCACCTTCGGGTGGGCCTTTCTGCGTTTTATACTAGAGTTTTTCAGCAGGA CGCACTGACCTCCCTATCAGTGATAGAGATTGACATCCCTATCAGTGATAGAG ATACTGAGCACATAT</p>                                                                                                                                   |
| <i>P<sub>J115</sub>-rbs32-<br/>uxR-B0015-<br/>P<sub>lux2</sub></i> | Inducible promoter with LuxR receptor (de novo synthesized) <sup>9</sup> | <p><b>TTTATAGCTAGCTCAGCCCTTGGTACAATGCTAGCTACTAGAGTCACACAGGA AAG</b>ACTAGATGAAAAACATAAAATGCCGACGACACATACAGAATAATTAATAA AATTAAAGCTTGTAGAAGCAATAATGATATTAATCAATGCCTTATCTGATATGA CTAAAAATGGTACATTGTGAATATTATTTACTCGCGATCATTTATCCTCATTCT ATGGTTAAATCTGATATTTCAATCCTAGATAATTACCCATAAAAAATGGAGGCA ATATTATGATGACGCTAATTTAATAAAAATATGATCCTATAGTAGATTATTCTA ACTCCAATCATTACCAATTAATTGGAATATATTTGAAAACAATGCTGTAAT AAAAAATCTCCAAATGTAATTAAGAAGCGAAAACATCAGGTCTTATCACTGG GTTTAGTTTTCCCTATTTCATACGGCTAACAATGGCTTCGGAATGCTTAGTTTTG CACATTCAGAAAAAGACAACCTATATAGATAGTTTATTTTTTACATGCGTGTATG AACATACCATTAAATTGTTCTTCTCTAGTTGATAATTATCGAAAAATAAATAT AGCAAATAATAAATCAAACAACGATTTAACCAAAGAGAAAAAGAATGTTTAG CGTGGGCATGCGAAGGAAAAAGCTCTTGGGATATTTCAAAAATATTAGGTTGC AGTGAGCGTACTGTCACTTTTCCATTTAACCAATGCGCAAATGAACTCAATAC AACAAACCGCTGCCAAAGTATTTCTAAAGCAATTTAACAGGAGCAATTGATT GCCCATACTTTAAAAATTAATAACACTGATAGTGCTAGTGTAGATCACTACTA GAGCCAGGCATCAAATAAACGAAAGGCTCAGTCGAAAGACTGGGCCTTTTCGT TTTATCTGTTGTTTGTGCGGTGAACGCTCTCTACTAGAGTCACACTGGCTCAC C TTCGGGTGGGCCTTTCTGCGTTTTATACTAGAGACCTGTAGGATCGTACAGG TTTACGCAAGAAAATGGTTTGTACTTTTGAATAAA</p> |

*hrpR*

Gene<sup>10, 11</sup>

---

ATGAGTACAGGCATCGATAAGGACGTCCGAGAGTGTGGGGCGTAACTGCATT  
ATCAGCGGGTCATCAAATTGCAATGAATAGCGCGTTTCTGGATATGGACTTGC  
TGTTGTGCGGGGAAACCGGCACCGGCAAGGACACACTGGCCAACCGCATTAC  
GAGTTGTCCAGCAGGTCGGGACCCTTTGTGGGCATGAACGCGCCGCATTCC  
CGAGTCGCTGGCAGAGAGCCAGTTATTCGGTGTGGTCAACGGTGCATTACCCG  
GCGTATGCCGGGCTCGCGAGGGCTACATAGAGGCCCTCCAGTGGTGGCACCTTG  
TACCTGGATGAAATCGACAGCATGCCGTTGAGCCTGCAAGCCAAACTGCTGCG  
TGTGTTGGAGAGTCGAGGTATCGAGCGTCTGGGCTCGACCGAATTTATCCCGG  
TGGATCTGCGGATCATTGCCCTCGGCCAGCGGCCACTGGATGAACGGTGGAA  
CAAGGACTTTTCCGTGCGGACCTGTTTTTTTCGGCTCAACGTGCTGACGCTTCA  
CTTGCCAGCCTTGCGCAAACGTGCTGAACAGATCCTGCCATTGTTTCGACCAGT  
TCACCCAGGGTATCGCTGCCGAGTTCGGACGTCCCCTCCTGCGCTGGACAGC  
GGGCGTGTGCAGCTGCTGCTCAGCCACGACTGGCCGGGCAACATCCGCGAATT  
GAAGTCTGCGGCCAAGCGCTTCGTACTCGGCTTCCCCTTGTGTTGGGCGCCGACC  
CTGTGGAAGCGCTTGACCCTGCCACGGGGCTGCGCACGCAAATGCGCATCATC  
GAGAAAATGCTCATCCAGGATGCCCTTGAAGCGGCACAGGCACAATTTTCGACGC  
GGTGTCTCAGGAGTTGGAGTTGCCAAGACGCACCCTGTATCACCGCATGAAGG  
AACTGGGAGTTGCAGCGCCGATCGCTGCGACGGCCGGGTCTAATAA

*hrpS*

Gene<sup>10, 11</sup>

---

ATGAGTCTTGATGAAAGGTTTGAGGATGATCTGGACGAGGAGCGGGTTCCGAA  
TCTGGGGATAGTTGCCGAAAGTATTTTCGCAACTGGGTATCGACGTGCTGCTAT  
CGGGTGAGACCGGCACGGGCAAAGACACGATTTGCCCGACGGATTCATGAGATG  
TCAGGCCGCAAAGGGCGCTGGTGGCGATGAATGCGCGGCCATTCGGGAGTC  
CCTCGCCGAGAGCGAGTTATTCGGCGTGGTCAAGCGGTGCCACACCGGCGCTG  
ATCGCTCCAGAGTCGGTTATGTCGAAGCGGCGCAGGGCGGCACGCTGTACCTG  
GATGAGATCGATAGCATGCCGCTGAGCCTGCAAGCCAAATTTGCTGAGGGTGTCT  
GGAAACCCGAGCGCTTGAACGGCTGGGTTCGACGTGACGATCAAGCTGGATA  
TCTGCGTGATCGCTCCGCCCAATGCTCGCTGGACGACGCCGTCGAGCGGGGG  
CAGTTTCGTGCGGATCTGTATTTTCGCCTGAACGTCTTGACACTCAAGCTTCC  
TCCGCTACGTAACCAGTCTGATCGCATAGTTCCCCTGTTACACGTTTTACGG  
CCGCCGCCGAGGGAGCTCGGTGTTCCCCTTCCCCTGTTTGGCCACTGCTG  
CACAAAGTGTGCTGGGCCACGACTGGCCCGGCAATATCCGTGAGCTCAAGGC  
GGCAGCCAAACGCCATGTGCTGGGTTTCCCCTTGTGTTGGGCGCCGAGCCGAGG  
GCGAAGAGCACTTGGCCTGTGGGCTCAAATCGCAATTGCGAGTGATCGAAAAA  
GCCCTGATTCAGGAGTCGCTCAAGCGCCACGACAATTGTGTGGATTCCGTAAG  
CCTGGAACCTGGACGTGCCACGCCGTACGCTCTATCGACGCATCAAAGAATTGC  
AGATCTAATAA

*hrpL*

Promoter<sup>10,</sup>

11

---

GCCGGATTATGTCCGCTGAGTGGGTCACGGTCCCAGATCAGTTCCCTTGC  
GCTGACCGATGTTTTTGTGCCAAAAGCTGTTGTGGCAAAAACGGTTTGC  
AAGTTTTGTATTACAAAGAATTTACATTTTAAAATATCTTTATAAATCAATC  
AGTTATTTCTATTTTAAAGCTGGCATGGTTATCGCTATAGGGCTTGTAC

---

|                |                          |                                                                                                                                                                                                                                                                                                                                                                                                                                                                                                                                                                                                                                                                                                                                                                                                                |
|----------------|--------------------------|----------------------------------------------------------------------------------------------------------------------------------------------------------------------------------------------------------------------------------------------------------------------------------------------------------------------------------------------------------------------------------------------------------------------------------------------------------------------------------------------------------------------------------------------------------------------------------------------------------------------------------------------------------------------------------------------------------------------------------------------------------------------------------------------------------------|
| <i>gfp</i>     | Gene <sup>12</sup>       | ATGCGTAAAGGAGAAGAACTTTTCACTGGAGTTGTCCCAATTCTTGTTGAATT<br>AGATGGTGATGTTAATGGGCACAAATTTTCTGTCTAGTGGAGAGGGTGAAGGTG<br>ATGCAACATACGGAAAACCTTACCCTTAAATTTATTTGCACTACTGGAAAAC<br>CCTGTTCCATGGCCAACACTTGTCACTACTTTTCGGTTATGGTGTTC AATGCTT<br>TGCGAGATACCCAGATCATATGAAACAGCATGACTTTTTTCAAGAGTGCCATGC<br>CCGAAGGTTATGTACAGGAAAGA ACTATATTTTTTCAAAGATGACGGGAACTAC<br>AAGACACGTGCTGAAGTCAAGTTTGAAGGTGATACCCTTGTTAATAGAATCGA<br>GTTAAAAGGTATTGATTTTTAAAGAAGATGGAAACATTCTTGGACACAAATTGG<br>AATACAAC TATAACTCACACAATGTATACATCATGGCAGACAAACAAAAGAAT<br>GGAATCAAAGT TAACTTCAAAAATTAGACACAACATTGAAGATGGAAGCGTTCA<br>ACTAGCAGACCA TTAACAACAAAATACTCCAATTGGCGATGGCCCTGTCTTT<br>TACCAGACAACCATTACCTGTCCACACAATCTGCCCTTTCGAAAGATCCCAAC<br>GAAAAGAGAGACCACATGGTCCTTCTTGAGTTTGTAAACAGCTGCTGGGATTAC<br>ACATGGCATGGATGAACTATACAAATAATAA |
| <i>rbs30</i>   | RBS <sup>10</sup>        | TCTAGAG <b>ATTAAAGAGGAGAAA</b> TACTAG <b>ATG</b>                                                                                                                                                                                                                                                                                                                                                                                                                                                                                                                                                                                                                                                                                                                                                               |
| <i>rbs32</i>   | RBS <sup>10</sup>        | TCTAGAG <b>TCACACAGGAAAG</b> TACTAG <b>ATG</b>                                                                                                                                                                                                                                                                                                                                                                                                                                                                                                                                                                                                                                                                                                                                                                 |
| <i>rbs33</i>   | RBS <sup>10</sup>        | TCTAGAG <b>TCACACAGGACT</b> TACTAG <b>ATG</b>                                                                                                                                                                                                                                                                                                                                                                                                                                                                                                                                                                                                                                                                                                                                                                  |
| <i>J114</i>    | Promoter <sup>13</sup>   | <u>TTTATGGCTAGCTCAGTCCTAGGTACAATGCTAGC</u>                                                                                                                                                                                                                                                                                                                                                                                                                                                                                                                                                                                                                                                                                                                                                                     |
| <i>J115</i>    | Promoter <sup>13</sup>   | <u>TTTATAGCTAGCTCAGCCCTTGGTACAATGCTAGC</u>                                                                                                                                                                                                                                                                                                                                                                                                                                                                                                                                                                                                                                                                                                                                                                     |
| B0015<br>(B15) | Terminator <sup>14</sup> | <b>CCAGGCATCAAATAAAACGAAAGGCTCAGTCGAAAGACTGGGCCTTTCGTTTT</b><br><b>ATCTGTTGTTTGTTCGGTGAACGCTCTCTACTAGAGTCACACTGGCTCACCTTC</b><br><b>GGGTGGGCCTTTCCTGCGTTTATA</b>                                                                                                                                                                                                                                                                                                                                                                                                                                                                                                                                                                                                                                               |

*pSB3K3*

Plasmid  
backbone<sup>15</sup>,  
16

---

```
TACTAGTAGCGGCCGCTGCAGTCCGGCAAAAAACGGGCAAGGTGTCACCACCTGCCCT
TTTTCTTTAAAACCGAAAAGATTACTTCGCGTTATGCAGGCTTCCTCGCTCACTGACTCC
CTGCGCTCGGTCGTTTCGGCTGCGGCGAGCGGTATCAGCTCACTCAAAGGCGGTAATCTCC
AGTCCCGTCAAGTCAGCGTAATGCTCTGCCAGTGTACAACCAATTAACCAATTCTGATJ
AGAAAACTCATCGAGCATCAAATGAAACTGCAATTTATTTCATATCAGGATTTATCAATA(
CATATTTTTGAAAAAGCCGTTTCTGTAATGAAGGAGAAAACTCACCGAGGCAGTTCATJ
GGATGGCAAGATCCTGGTATCGGTCTGCGATTCCGACTCGTCCAACATCAATACAACCTJ
TTAATTTCCCTCGTCAAAAAATAAGGTTATCAAGTGAGAAATCACCATGAGTGACGACT(
AATCCGGTGAGAATGGCAAAAGCTTATGCATTTCTTTCCAGACTTGTTC AACAGGCCAG(
CATTACGCTCGTCATCAAAATCACTCGCATCAACCAAACCGTTATTTCATTTCGTGATTGC(
CCTGAGCGAGACGAAATACGCGATCGCTGTTAAAAGGACAATTACAAACAGGAATCGAAJ
GCAACCGGCGCAGGAACACTGCCAGCGCATCAACAATATTTTACCTGAATCAGGATATJ
CTTCTAATACCTGGAATGCTGTTTTCCCGGGGATCGCAGTGGTGAGTAACCATGCATCAJ
CAGGAGTACGGATAAAATGCTTGATGGTCGGAAGAGGCATAAATTCGTCAGCCAGTTTJ
GTCTGACCATCTCATCTGTAACATCATTGGCAACGCTACCTTTGCCATGTTTCAGAAACJ
ACTCTGGCGCATCGGGCTTCCCATACAATCGATAGATTGTGCGACCTGATTGCCCGACAJ
TATCGCGAGCCATTTATACCCATATAAATCAGCATCCATGTTGGAATTTAATCGCGGC(
TCGAGCAAGACGTTTCCCGTTGAATATGGCTCATAACACCCCTTGTATTACTGTTATGJ
AAGCAGACAGTTTTATTGTTTCATGATGATATAATTTTTATCTTGTGCAATGTAACATCAGJ
GATTTTGAGACACAACGTGGCTTTGTTGAATAAATCGAACTTTTGTGAGTTGAAGGAT(
AGATCACGCATCTTCCCGACAACGCAGACCGTTCCGTGGCAAAGCAAAGTTCAAATCJ
CCAACCTGGTCCACCTACAACAAAGCTCTCATCAACCGTGGCTCCCTCACTTTCTGGCTG(
ATGATGGGGCGATTTCAGGCTGGTATGAGTCAGCAACACCTTCTTCACGAGGCAGACCT(
AGCGCTAGCGGAGTGTATACTGGCTTACTATGTTGGCACTGATGAGGGTGTCACTGAAGJ
GCTTCATGTGGCAGGAGAAAAAGGCTGCACCGGTGCGTCAGCAGAATATGTGATACAG(
ATATATTCGCTTCTCTCGCTCACTGACTCGCTACGCTCGGTGCTTCGACTGCGGGCAGC(
GAAATGGCTTACGAACGGGGCGGAGATTTCTGGAAGATGCCAGGAAGATACTTAAACAG(
GAAGTGAGAGGGCCGCGGCAAAGCCGTTTTTCCATAGGCTCCGCCCCCTGACAAGCAT(
ACGAAATCTGACGCTCAAATCAGTGGTGGCGAAACCCGACAGGACTATAAAGATAACCAG(
CGTTTCCCTGGCGGCTCCCTCGTGCCTCTCTCTGTTCTCTGCTTTTCGGTTTACCGGTGJ
CATTCCGCTGTATGGCCGCGTTTGTCTCATTCCACGCTGACACTCAGTTCGGGTAG(
CAGTTCGCTCCAAGCTGGACTGTATGCACGAACCCCGTTTCAGTCCGACCGCTGCGCCJ
TATCCGGTAACTATCGTCTTGAGTCCAACCCGAAAGACATGCAAAAGCACCCTGGCA(
CAGCCACTGGTAATTGATTTAGAGGAGTTAGTCTTGAAGTCATGCGCCGGTTAAGGCTAJ
ACTGAAAGGACAAGTTTTGGTGACTGCGCTCCTCCAAGCCAGTTACCTCGGTTCAAAGA(
TTGGTAGCTCAGAGAACCTTCGAAAACCGCCCTGCAAGGCGGTTTTTTTCGTTTTCAGAC(
CAAGAGATTACGCGCAGACCAAAACGATCTCAAGAAGATCATCTTATTAAGGGTCTGA(
GCTCAGTGGAACGAAAACCTACGTTAAGGGATTTTGGTTCATGAGATTATCAAAAAGGAT(
TTCACCTAGATCCTTTTAAATTAATAATGAAGTTTTAAATCAATCTAAAGTATATATGA(
TAAACTTGGTCTGACAGTTACCAATGCTTAATCAGTGAGGCACCTATCTCAGCGATCTGJ
CTATTTTCGTTTCATCCATAGTTGCCTGACTCCCCGTCGTGTAGATAACTACGATACGGGAC(
GGCTTACCATCTGGCCCCAGTGCTGCAATGATACCGCGAGACCCACGCTCACCGGCTCCJ
GATTTATCAGCAATAAACGACCCAGCCGGAAGGGCCGAGCGCAGAAGTGGTCTGCAACJ
TTATCCGCCCTCCATCCAGTCTATTCCATGGTGCCACCTGACGCTAAGAAACCATTATTJ
TCATGACATTAACCTATAAAAAATAGGCGTATCACGAGGCAGAATTTTCAGATAAAAAAAAJ
CCTTAGCTTTTCGCTAAGGATGATTTCTGGAATTCGCGGCCGCTTCTAGAG
```

---

*pSB4K5*

Plasmid  
backbone<sup>16</sup>,  
17

TACTAGTAGCGGCCGCTGCAGGAGTCACTAAGGGTTAGTTAGTTAGATTAGCAGAAAAGTC  
AAAAGCCTCCGACCGGAGGCTTTTGACTAAAACCTCCCTTGGGGTTATCATTTGGGGCTC/  
CTCAAAGGCGTAATCAGATAAAAAAATCCTTAGCTTTTCGCTAAGGATGATTTCTGCT/  
GTATTATTAGAAAACTCATCGAGCATCAAATGAAACTGCAATTTATTTCATATCAGGAT/  
ATCAATACCATATTTTGAAGGAGCCGTTTCTGTAATGAAGGAGAAAACTCACCGAGGC/  
GTTCCAAAGAATGGCAAGGTCCTGGTAACGGTCTGCGATTCCGACCCGTTCCAAACATCAA/  
ACAACCTATTAATTTCCCTCGTCAAAAATAAGGTTATCAAGTGAGAAATCACCATGAG/  
GACGACTGAATCCGGTGAGAATGGCAAGAGCTTGTGCATTTCTTCCAGACTTGTTCAC/  
AGGCCAGCCATTACGCTCGTCATCAAAATCACTCGCATCAACCAAACCGTTATTCATGCC/  
TGATTGCGCCTGAGCAAGACGAAATACACGATCGCTGTTAAAAGGACAATTACAAACAGC/  
AATCGAATGTAACCGGCGCAGGAACACGGCCAGCGCATCAACAATATTTTCACCTGAATC/  
AGGATATTTCTTAATACCTGGAAAGGCTGTTTTCCAGGAATCGCGGTGGTGAGTAACC/  
CGCATATCAGGAGTACGGATAAAATGCTTGATGGTGGGAGAGGCATAAACTCCGTCAC/  
CCAGTTGAGACGGACCATCTCATCTGTAACATCATTGGCAACGCTACCTTTGCCATGTT/  
CAGAAACAACCTGGCGCATCGGGCTTCCCATAAAGCGATAGATTGTGCGACCTGATT/  
CCCGACATTATCGCGAGCCATTTATACCCATATAAAATCAGCGTCCATGTTGGAGTTTA/  
GCGCGGACGGGAGCAAGACGTTTCCCGTTGAATATGGCTCATAACACCCCTTGATTAC/  
GTTTATGTAAGCAGACAGTTTTATTGTTTCATGATGATATATTTTTATCTTGTGCAATGT/  
ACATCAGAGATTTTGAGACACAACGTGGCTTTGTTGAATAAAATCGAACTTTTGTGAGT/  
GAAGGATCAGCTCTAGTAGTTACATTGTTCGATCTGTTTCATGGTGAACAGCTTTGAATGC/  
CCAAAACCTCGTAAAAGCTCTGATGTATCTATCTTTTTTACACCGTTTTTCATCTGTGCA/  
ATGGACAGTTTTCCCTTTGATATGTAACGGTGAACAGTTGTTCTACTTTTGTTTGTTAG/  
CTTGATGCTTCACTGATAGATACAAGAGCCATAAGAACCTCAGATCCTTCCGTATTTAGC/  
CAGTATGTTCTCTAGTGTGGTTCGTTGTTTTTGGTGGAGCCATGAGAACGAACCATTGAC/  
ATCATACTTACTTTGCATGTCACTCAAAAATTTTGCCTCAAACTGGTGGAGCTGAATTT/  
TGCAGTTAAAGCATCGTGTAGTGTTTTTCTTAGTCCGTTATGTAGGTAGGAATCTGATG/  
AATGGTTGTTGGTATTTTGTCAACATTCATTTTTATCTGGTTGTTCTCAAGTTCGGTTAC/  
GAGATCCATTTGTCTATCTAGTTCAACTTGGAAAATCAACGTATCAGTCCGGCCGGCCTCC/  
CTTATCAACCACCAATTTTCATATGCTGTAAGTGTTTAAATCTTTACTTATTGGTTTTCA/  
AACCCATGGTTAAGCCTTTTAAACTCATGGTAGTTATTTTCAAGCATTAAACATGAACT/  
AAATTCATCAAGGCTAATCTCTATATTTGCCTTGTGAGTTTTCTTTTGTGTTAGTTCTT/  
TAATAACCACCTCATAAATCCTCATAGAGTATTTGTTTTCAAAAGACTTAACATGTTCCAC/  
ATTATATTTTATGAATTTTTTAACTGGAAAAGATAAGGCAATATCTCTTCACTAAAAAC/  
TAATTCATATTTTTCGCTTGAGAACTTGGCATAAGTTTGTCCACTGGAAAATCTCAAAGCC/  
TTTAAACCAAAGGATTCCTGATTTCCACAGTTCTCGTCATCAGCTCTCTGGTTGCTTTAGC/  
TAATACACCATAAGCATTTCCTACTGATGTTTCATCATCTGAGCGTATTGGTTATAAG/  
GAACGATACCGTCCGTTCTTCCCTGTAGGGTTTTCAATCGTGGGGTTGAGTAGTGCCA/  
ACAGCATAAAATAGCTTGGTTTCATGCTCCGTTAAGTCATAGCGACTAATCGCTAGTT/  
ATTTGCTTTGAAAACAACATAATCAGACATACATCTCAATGGTCTAGGTGATTTTAATC/  
ACTATACCAATGAGATGGGCTAGTCAATGATAATTACATGTCTTTTCCCTTTGAGTTG/  
GGGTATCTGTAATTTCTGCTAGACCTTTGCTGGAAAACCTGTAAATTTCTGCTAGACCCCT/  
TGTAATTCGCTAGACCTTTGTGTGTTTTTTTTGTTTATATCAAGTGGTTATAATTT/  
TAGAATAAAGAAAGAATAAAAAAGATAAAAAAGAATAGATCCAGCCCTGTGTATAACT/  
ACTACTTTAGTCAGTTCCGCAGTATTACAAAAGGATGTGCGAAAACGCTGTTTGTCTCTC/  
ACAAAACAGACCTTAAAACCTTAAAGGCTTAAAGTAGCACCCCTCGCAAGCTCGGGCAAATC/  
GCTGAATATTCCTTTTGTCTCCGACCATCAGGCACCTGAGTCGCTGTCTTTTTCTGTGAC/  
TTCAGTTCGCTGCGCTCACGGCTCTGGCAGTGAATGGGGGTAATGGCACTACAGGCGCC/  
TTTTATGGATTCATGCAAGGAACTACCCATAATACAAGAAAAGCCCGTCACGGGCTTCT/  
CAGGGCGTTTTATGGCGGGTCTGCTATGTGGTGCTATCTGACTTTTTGCTGTTTCAGCAG/  
TCCTGCCCTCTGATTTTCCAGTCTGACCACTTCGGATTATCCCGTGACAGGTCAATTCAG/  
CTGGCTAATGCACCCAGTAAGGCAGCGGTATCATCAACAGGCTTACCCGCTTACTGTCC/  
CTAGTGCTTGATTCTCACCAATAAAAAACGCCCGGGCAACCGAGCGTTCTGAACAA/  
TCCAGATGGAGTCTGAGGTCATTAAGTGGATCTATCAACAGGAGTCCAAGCAGCTCGT/  
AACTTGGTCTGACAGCTCTAGCTCCGGCAAAAAACGGGCAAGGTGTCACCACCCCTGCC/  
TTTTTCTTTAAAACCGAAAAGATTACTTCGCGTTTGCCACCTGACGCTAAGAAAAGGA/  
TATTCAGCAATTTGCCCGTGCCGAAGAAAGGCCACCCGTGAAGGTGAGCCAGTGAGTTC/  
ATTGCTACGTAATTAGTTAGTTAGCCCTTAGTGACTCGAATTCGCGGCCGCTTCTAGAG

## 7. Supplementary References

- [1] Zwietering, M. H., Jongenburger, I., Rombouts, F. M., and van 't Riet, K. (1990) Modeling of the Bacterial Growth Curve, *Appl. Environ. Microbiol.* 56, 1875-1881.
- [2] Robinson, J. T., Thorvaldsdóttir, H., Winckler, W., Guttman, M., Lander, E. S., Getz, G., and Mesirov, J. P. (2011) Integrative Genomics Viewer, *Nat. Biotechnol.* 29, 24-26.
- [3] Robinson, M. D., McCarthy, D. J., and Smyth, G. K. (2010) edgeR: a Bioconductor package for differential expression analysis of digital gene expression data, *Bioinformatics* 26, 139-140.
- [4] Dennis, G., Sherman, B. T., Hosack, D. A., Yang, J., Gao, W., Lane, H. C., and Lempicki, R. A. (2003) DAVID: Database for Annotation, Visualization, and Integrated Discovery, *Genome Biol.* 4, R60.
- [5] Huang, D. W., Sherman, B. T., and Lempicki, R. A. (2009) Systematic and integrative analysis of large gene lists using DAVID bioinformatics resources, *Nat. Protocols* 4, 44-57.
- [6] Salgado, H., et al. (2013) RegulonDB v8.0: omics data sets, evolutionary conservation, regulatory phrases, cross-validated gold standards and more, *Nucleic Acids Res.* 41, D203-D213.
- [7] Zhou, K., Zhou, L., Lim, Q. E., Zou, R., Stephanopoulos, G., and Too, H.-P. (2011) Novel reference genes for quantifying transcriptional responses of Escherichia coli to protein overexpression by quantitative PCR, *BMC Molecular Biology* 12, 18-18.
- [8] Luo, H., Lin, Y., Gao, F., Zhang, C.-T., and Zhang, R. (2014) DEG 10, an update of the database of essential genes that includes both protein-coding genes and noncoding genomic elements, *Nucleic Acids Res.* 42, D574-D580.
- [9] Wang, B., Barahona, M., and Buck, M. (2015) Amplification of small molecule-inducible gene expression via tuning of intracellular receptor densities, *Nucleic Acids Res.* 43, 1955-1964.
- [10] Wang, B., Kitney, R. I., Joly, N., and Buck, M. (2011) Engineering modular and orthogonal genetic logic gates for robust digital-like synthetic biology, *Nat. Commun.* 2, 508.
- [11] Collmer, A., et al. (2000) Pseudomonas syringae Hrp type III secretion system and effector proteins, *Proc Natl Acad Sci USA* 97, 8770-8777.
- [12] Green fluorescent protein derived from jellyfish Aequorea victoria, <[http://parts.igem.org/Part:BBa\\_E0040](http://parts.igem.org/Part:BBa_E0040)>
- [13] Constitutive promoter family catalog, <<http://parts.igem.org/Promoters/Catalog/Anderson>>.
- [14] B0015 double terminator, <[http://parts.igem.org/Part:BBa\\_B0015](http://parts.igem.org/Part:BBa_B0015)>.
- [15] pSB3K3 plasmid backbone, <<http://parts.igem.org/Part:pSB3K3>>.
- [16] Shetty, R., Endy, D., and Knight, T. (2008) Engineering BioBrick vectors from BioBrick parts, *J. Biol. Eng.* 2, 5.
- [17] pSB4K5 plasmid backbone, <<http://parts.igem.org/Part:pSB4K5>>.
